# Supplementary material for: Radiosynthesis of (R,S)‐[18F]GE387: A Potential PET Radiotracer for Imaging Translocator Protein 18 kDa (TSPO) with Low Binding Sensitivity to the Human Gene Polymorphism rs6971
Source: PubMed Central journal article supplement (PMC6563049; doi:10.1002/cmdc.201900023), 2019-04-08

## Supporting Information

### **Radiosynthesis of (*R,S*)-[<sup>18</sup>F]GE387: A Potential PET Radiotracer for Imaging Translocator Protein 18 kDa (TSPO) with Low Binding Sensitivity to the Human Gene Polymorphism rs6971**

Luxi Qiao<sup>+, [a]</sup> Emily Fisher<sup>+, [a]</sup> Lindsay McMurray,<sup>[a]</sup> Selena Milicevic Sephton,<sup>\*[a]</sup> Matthew Hird,<sup>[a]</sup> Nisha Kuzhuppilly-Ramakrishnan,<sup>[a]</sup> David J. Williamson,<sup>[a]</sup> Xiouyun Zhou,<sup>[a]</sup> Eryn Werry,<sup>[b]</sup> Michael Kassiou,<sup>[b]</sup> Saijinder Luthra,<sup>[c]</sup> William Trigg,<sup>[c]</sup> and Franklin I. Aigbirio<sup>\*[a]</sup>

cmdc\_201900023\_sm\_miscellaneous\_information.pdf

## Supporting information: CONTENTS

|                            |            |
|----------------------------|------------|
| FXF <sub>N</sub> schematic | <b>S2</b>  |
| NMR Spectra                | <b>S3</b>  |
| HPLC Data                  | <b>S20</b> |

F<sub>x</sub>FN schematic

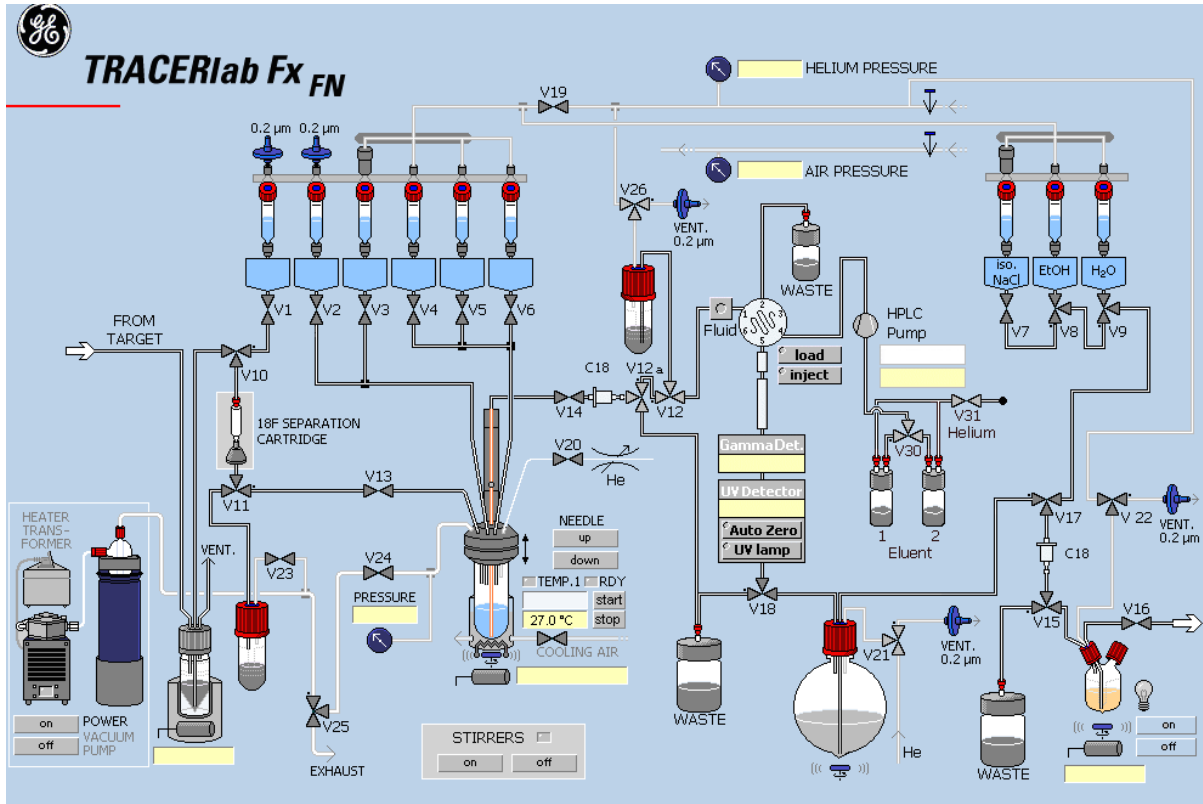

Figure S1: Schematic representation of F<sub>x</sub>FN TRACERLab module

## Supporting information: NMR Data

$^1\text{H}$  NMR spectra were recorded in Fourier transform mode at the field strength specified using standard 5 mm diameter tubes. Chemical shifts in ppm is quoted relative to residual solvent signals calibrated as follows:  $\text{CDCl}_3$   $\delta_{\text{H}}$  ( $\text{CHCl}_3$ ) = 7.26 ppm;  $\delta_{\text{C}}$  ( $\text{CHCl}_3$ ) = 77.2 ppm. Unless otherwise stated spectra were collected at ambient temperature.

| Compound  | $^1\text{H}/^{13}\text{C}$ NMR | Page |
|-----------|--------------------------------|------|
| <b>10</b> | 300 MHz, $\text{CDCl}_3$       | S4   |
| <b>13</b> | 300 MHz, $\text{CDCl}_3$       | S5   |
| <b>6</b>  | 300/75 MHz, $\text{CDCl}_3$    | S6/7 |
| <b>18</b> | 300 MHz, $\text{CDCl}_3$       | S8   |
| <b>20</b> | 300 MHz, $\text{CDCl}_3$       | S9   |
| <b>21</b> | 300 MHz, $\text{CDCl}_3$       | S10  |

| Compound  | $^1\text{H}/^{13}\text{C}$ NMR | Page   |
|-----------|--------------------------------|--------|
| <b>25</b> | 300/75 MHz, $\text{CDCl}_3$    | S11/12 |
| <b>26</b> | 300 MHz, $\text{CDCl}_3$       | S13    |
| <b>27</b> | 300 MHz, $\text{CDCl}_3$       | S14    |
| <b>29</b> | 300 MHz, $\text{CDCl}_3$       | S15/16 |
| <b>30</b> | 300 MHz, $\text{CDCl}_3$       | S17/18 |

SFC data for chiral separation of **6**

**S20/21**

Semi-prep HPLC data for [ $^{18}\text{F}$ ]**6**

**S22/23**

Chiral HPLC data for [ $^{18}\text{F}$ ]**6**

**S24/25**

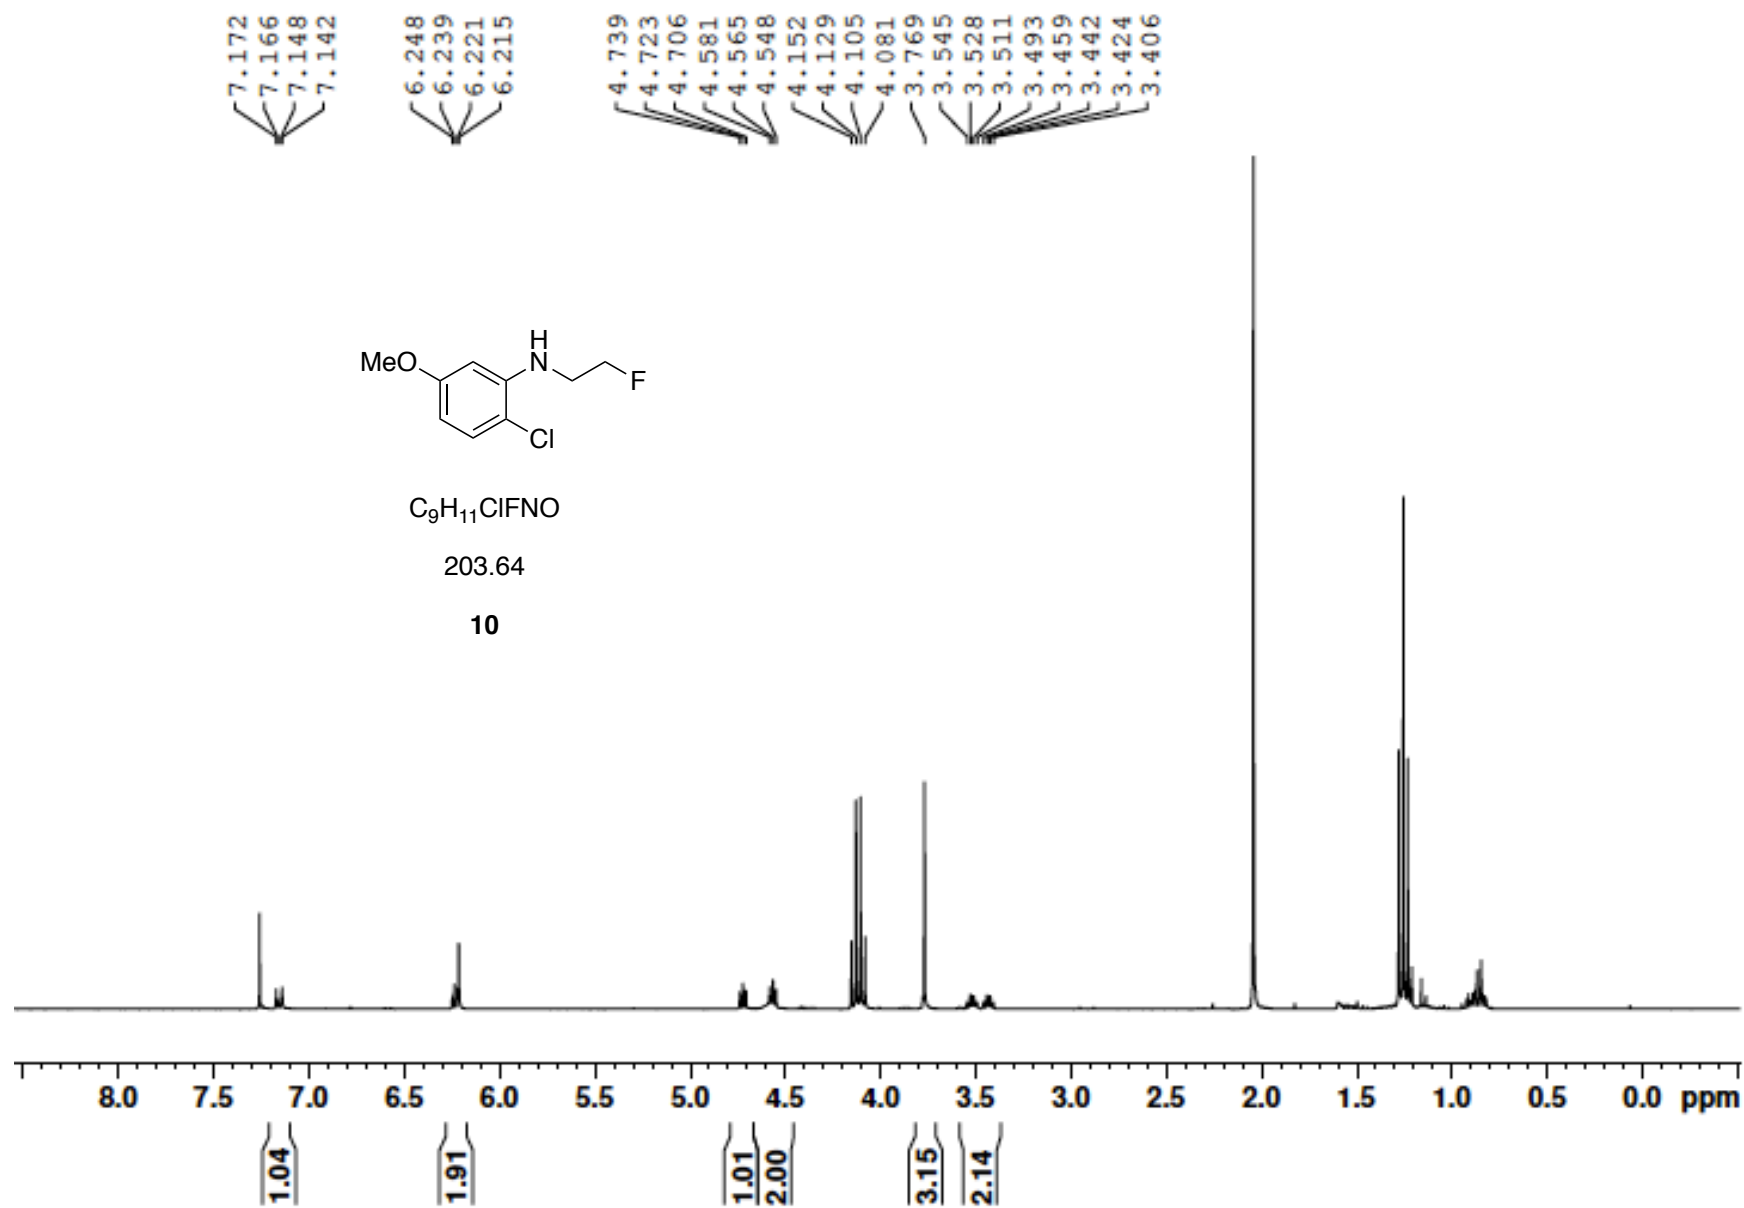

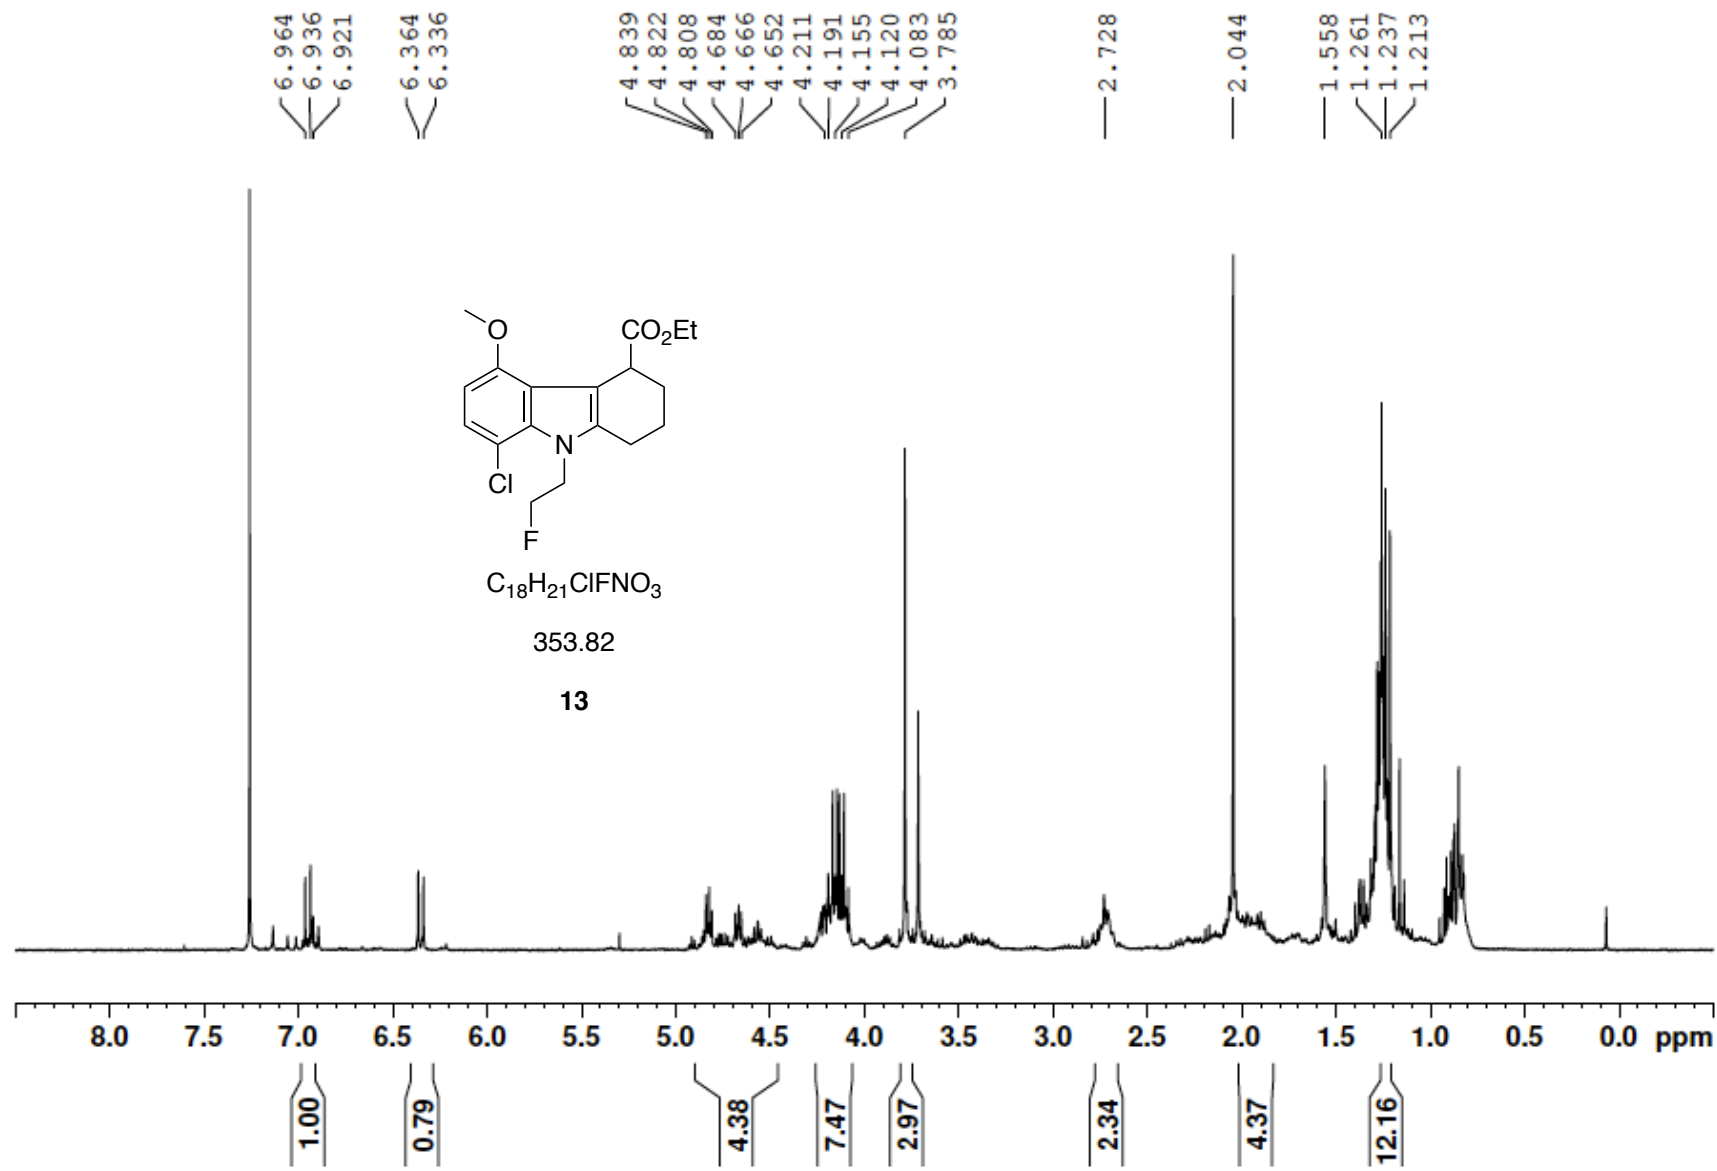

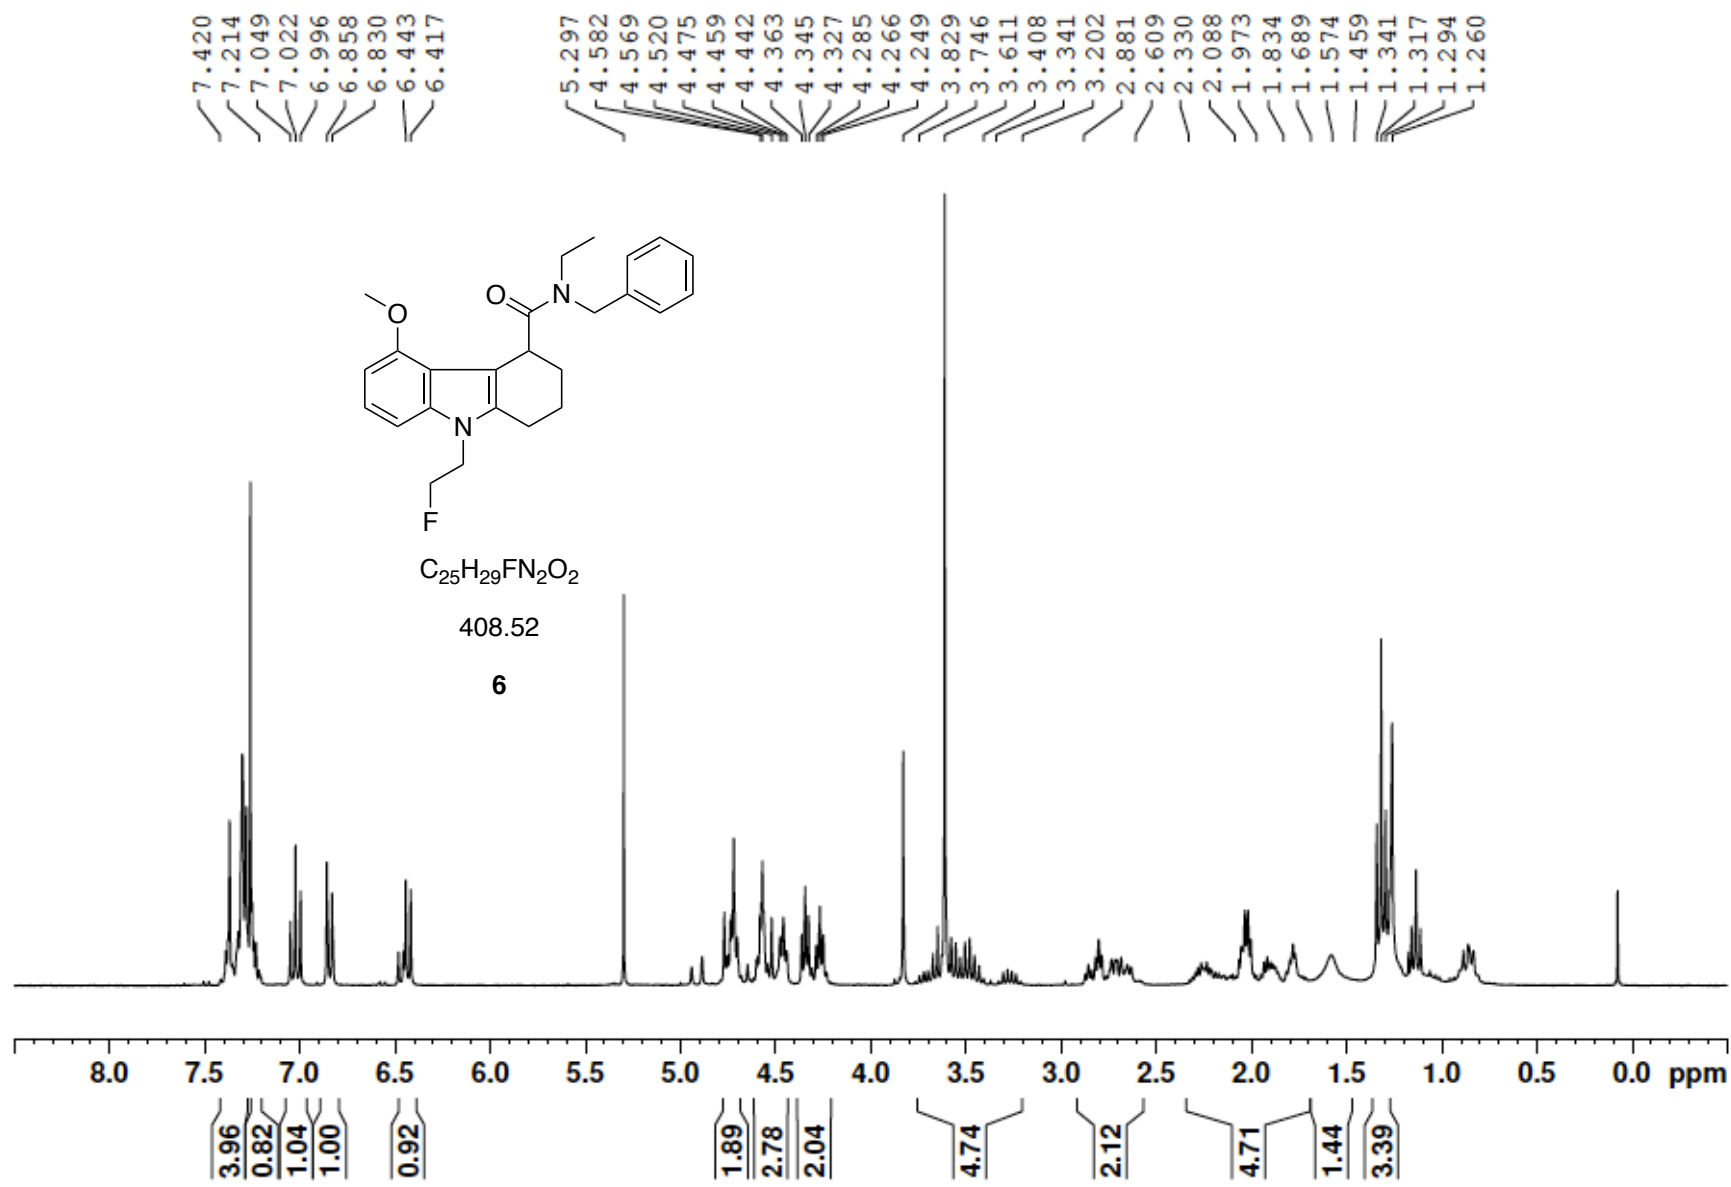

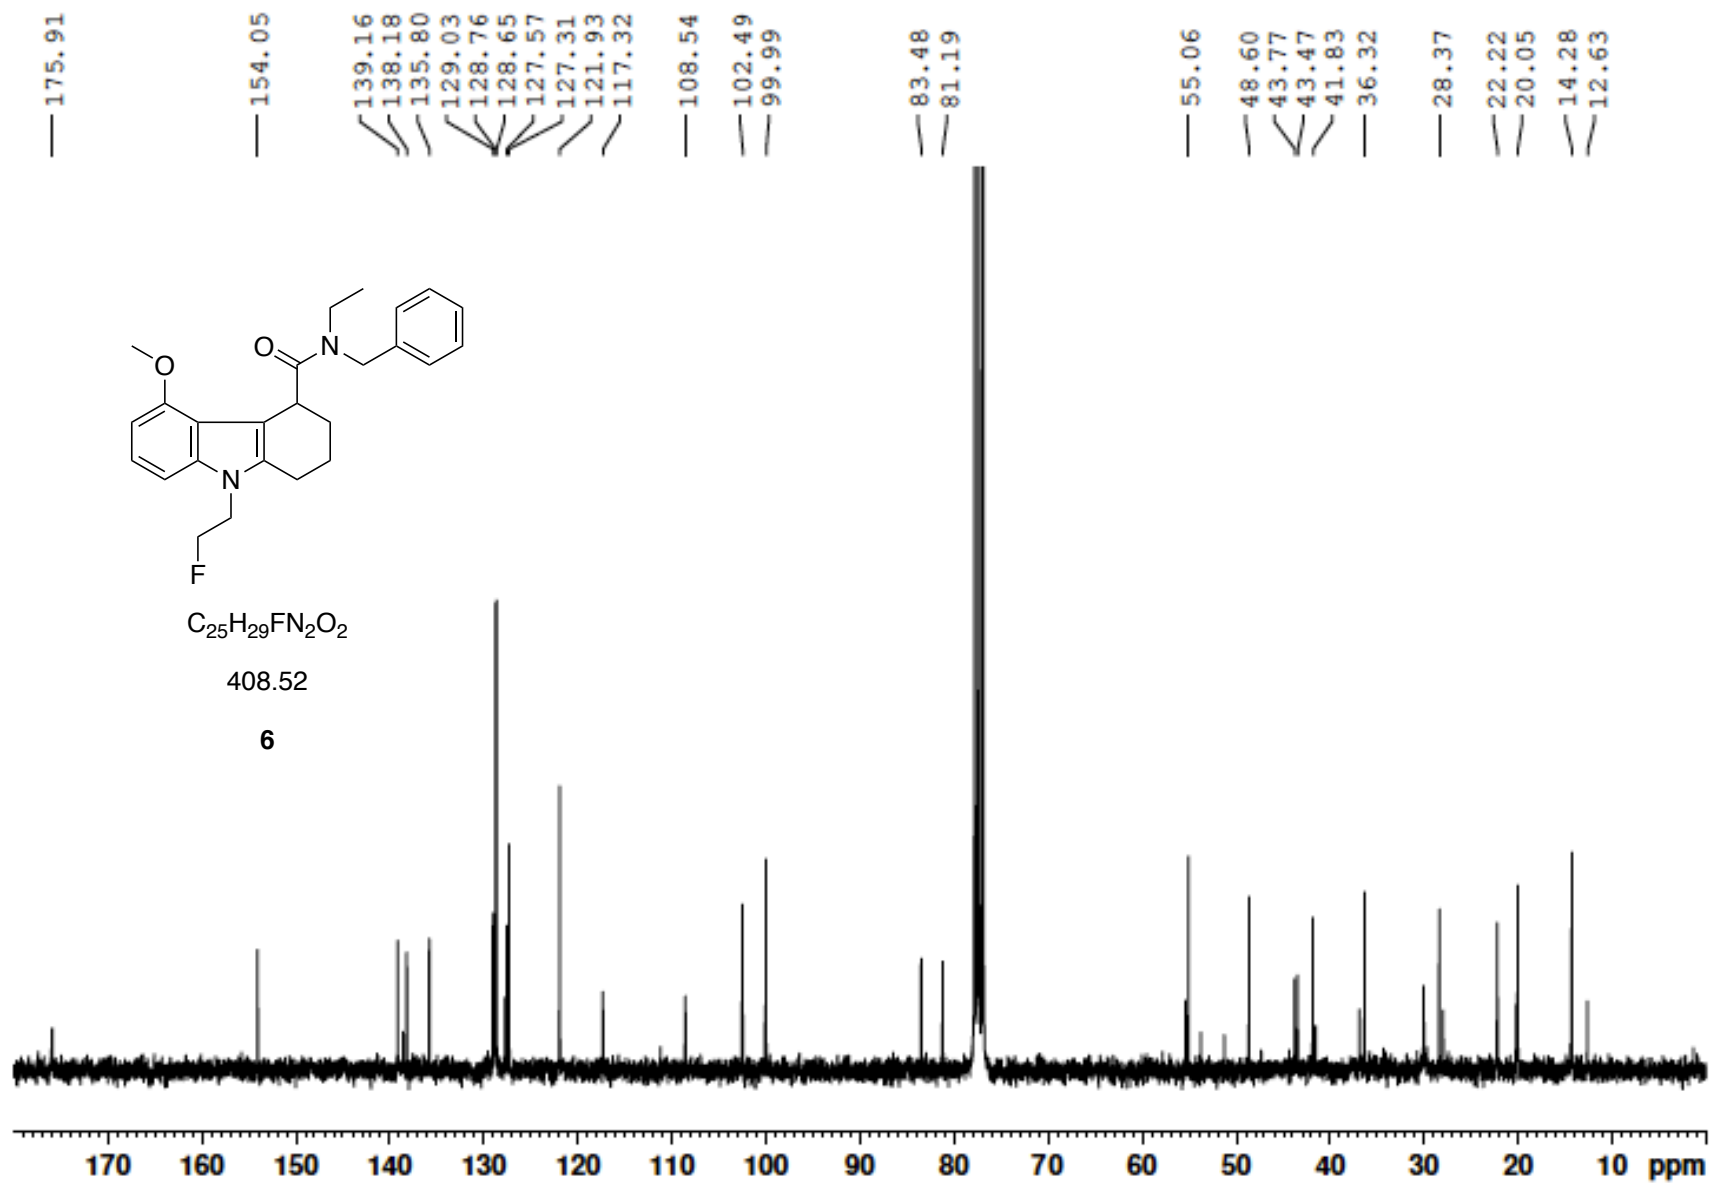



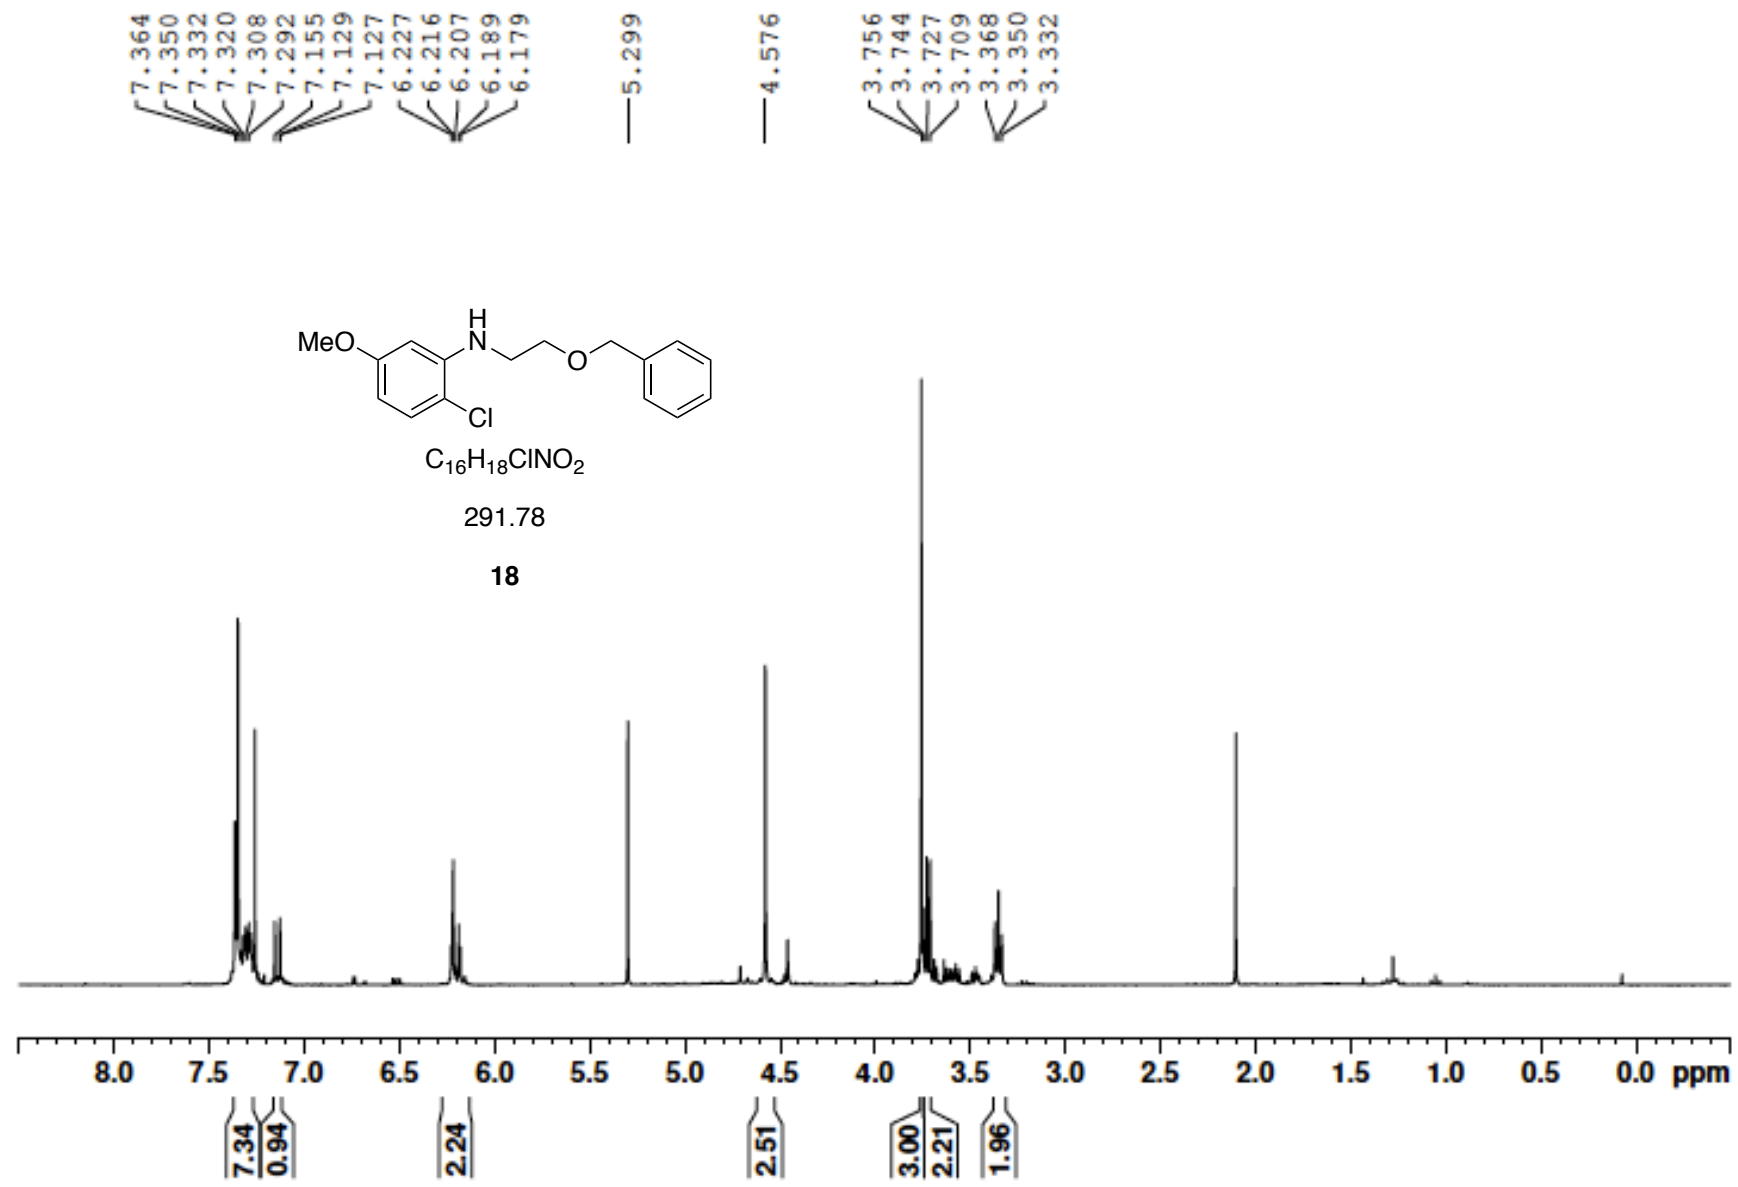

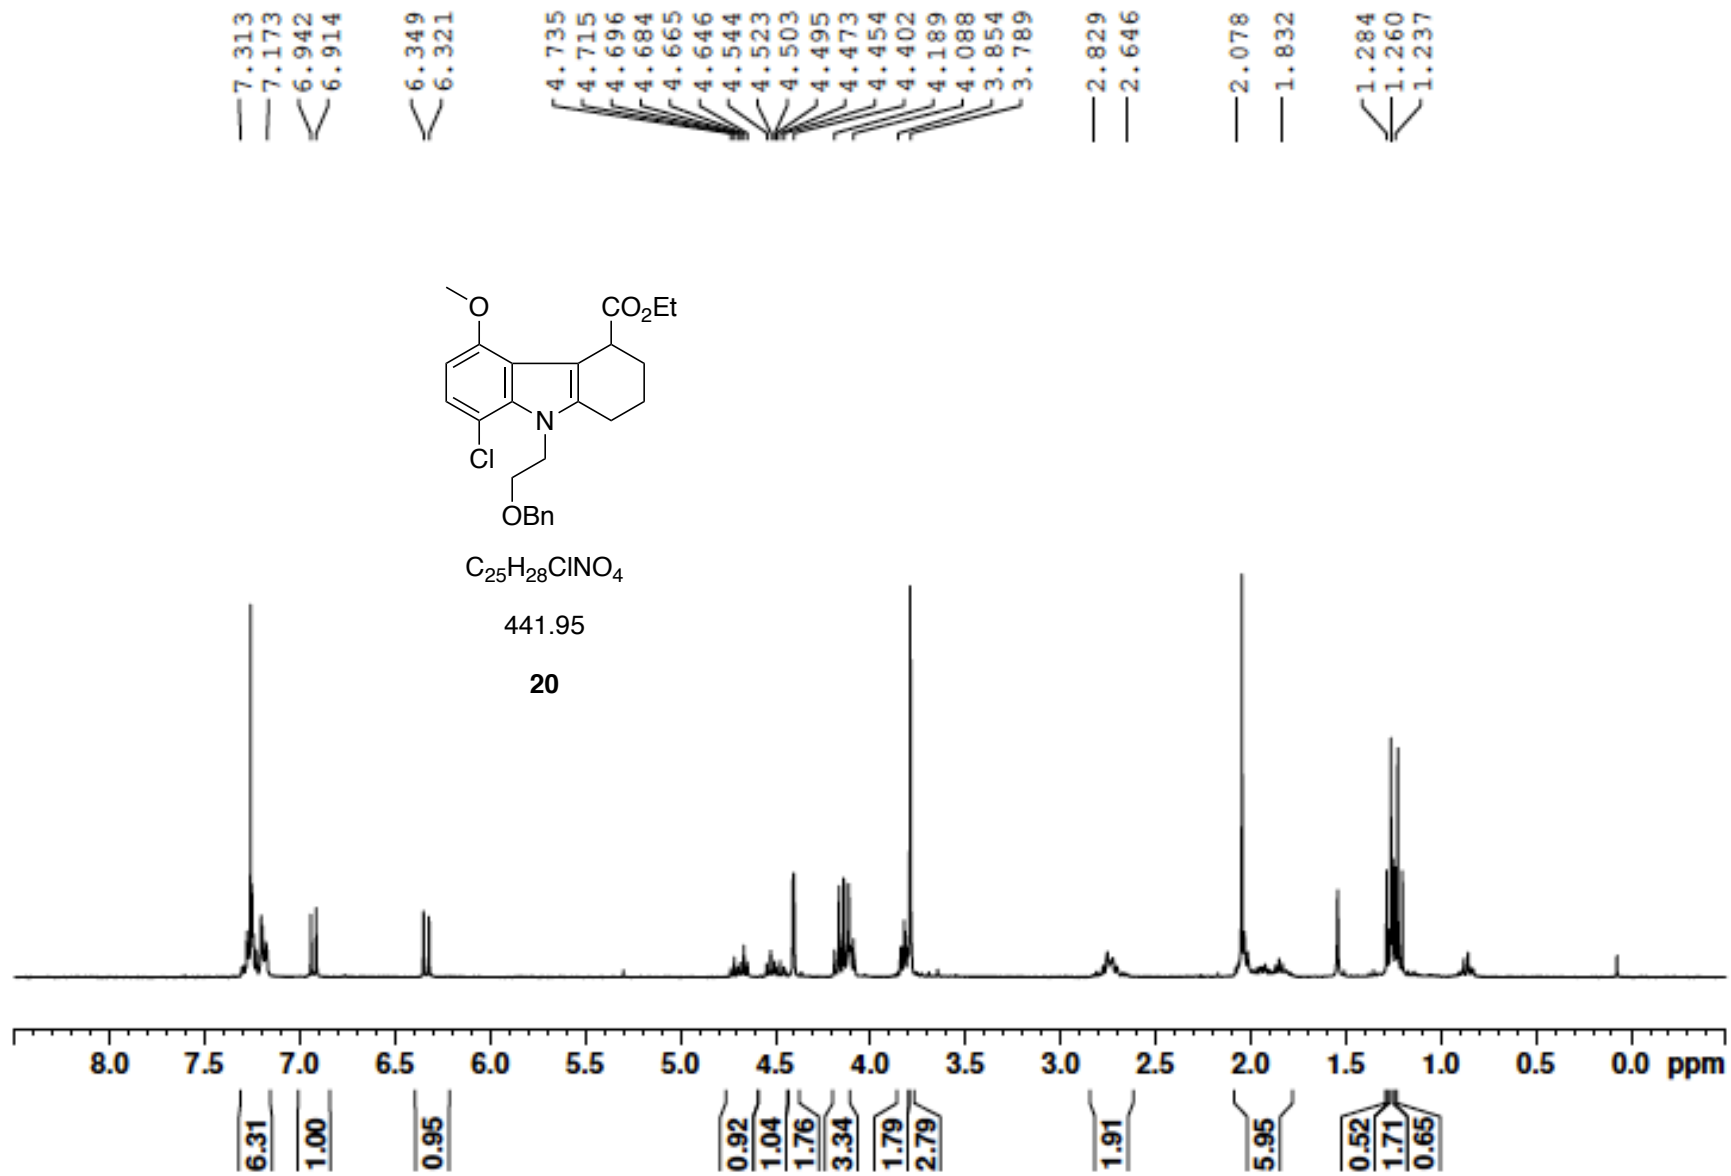

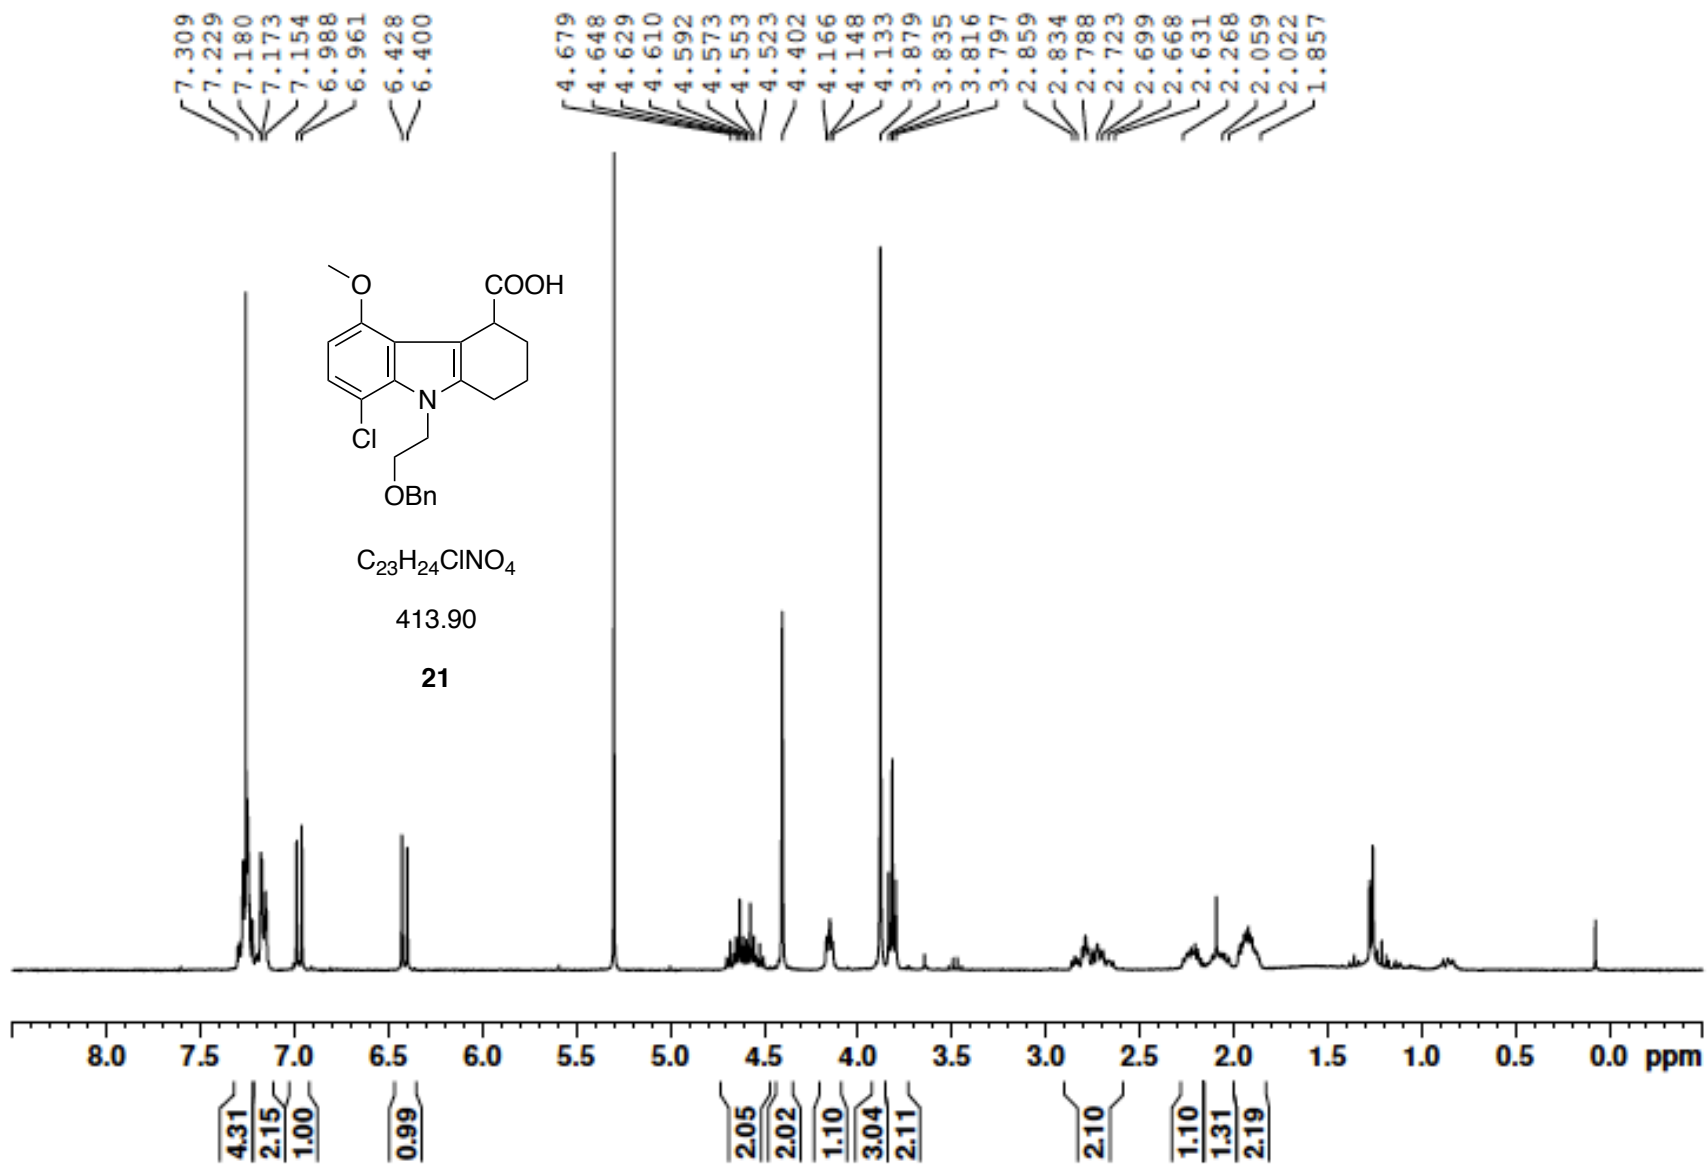

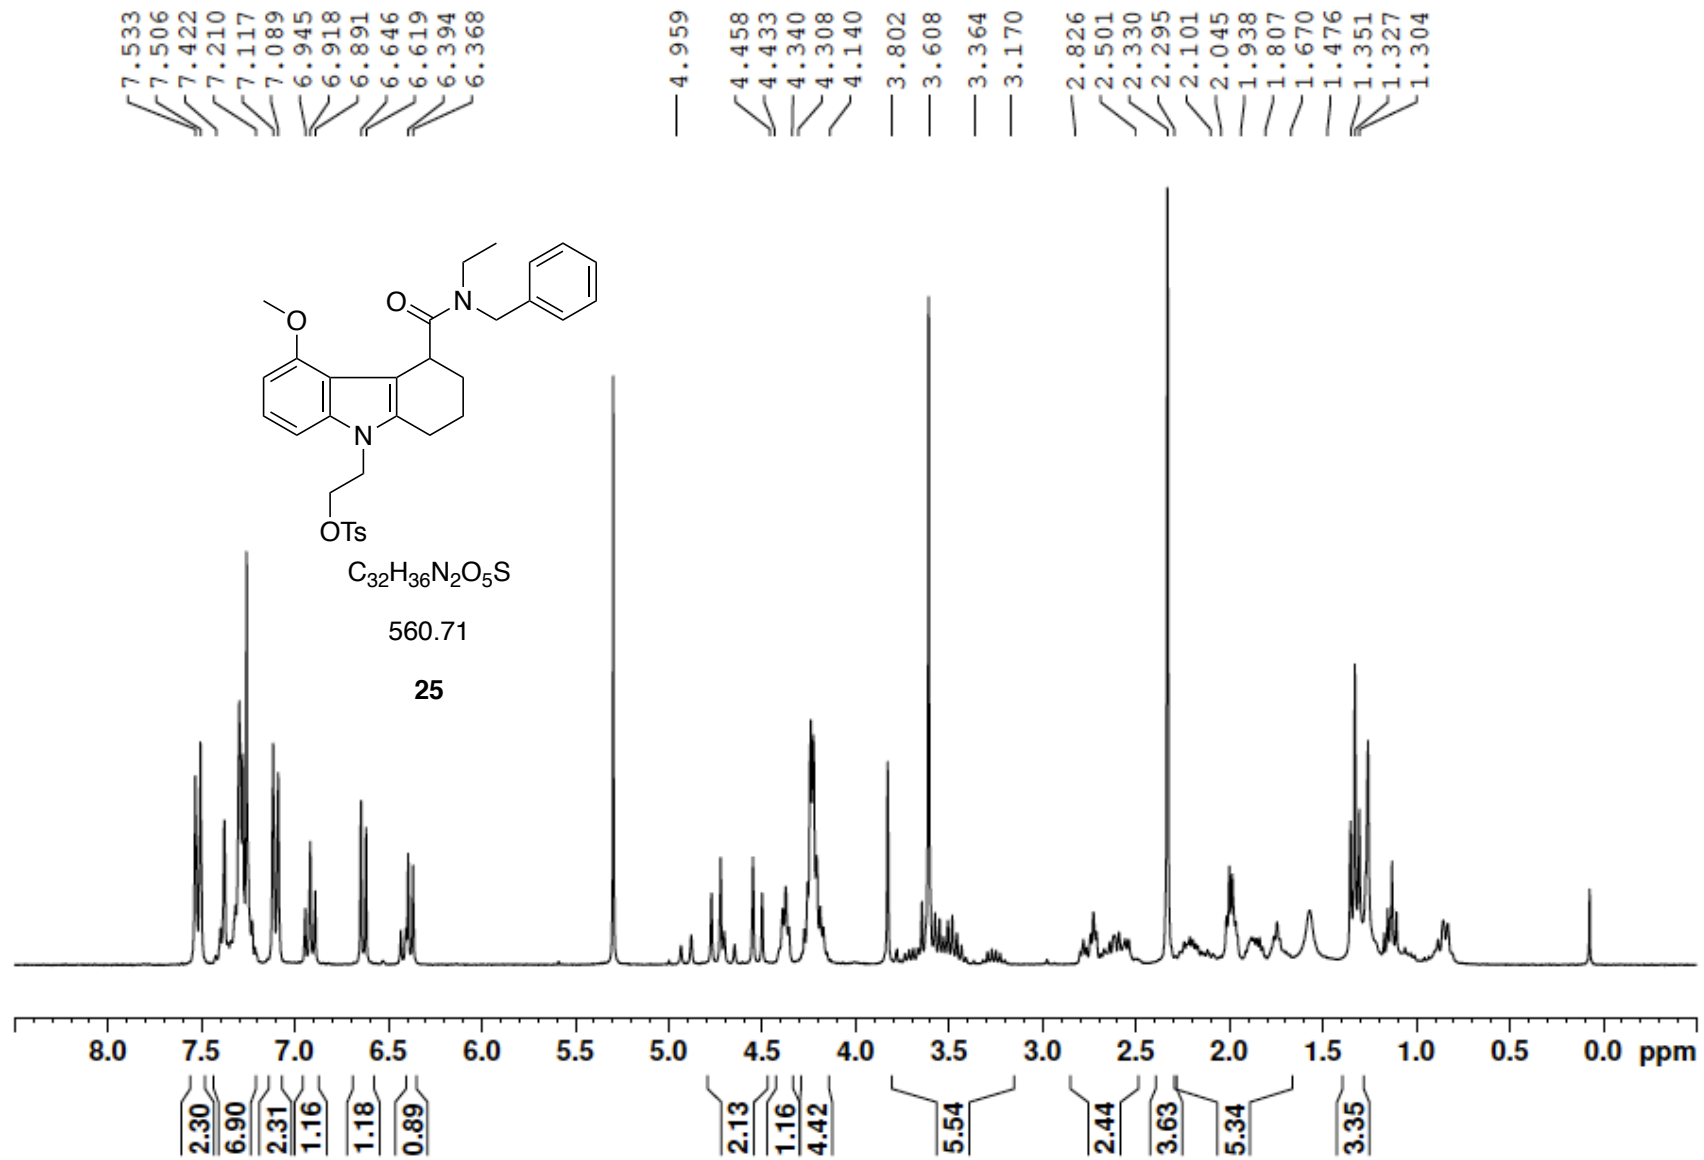

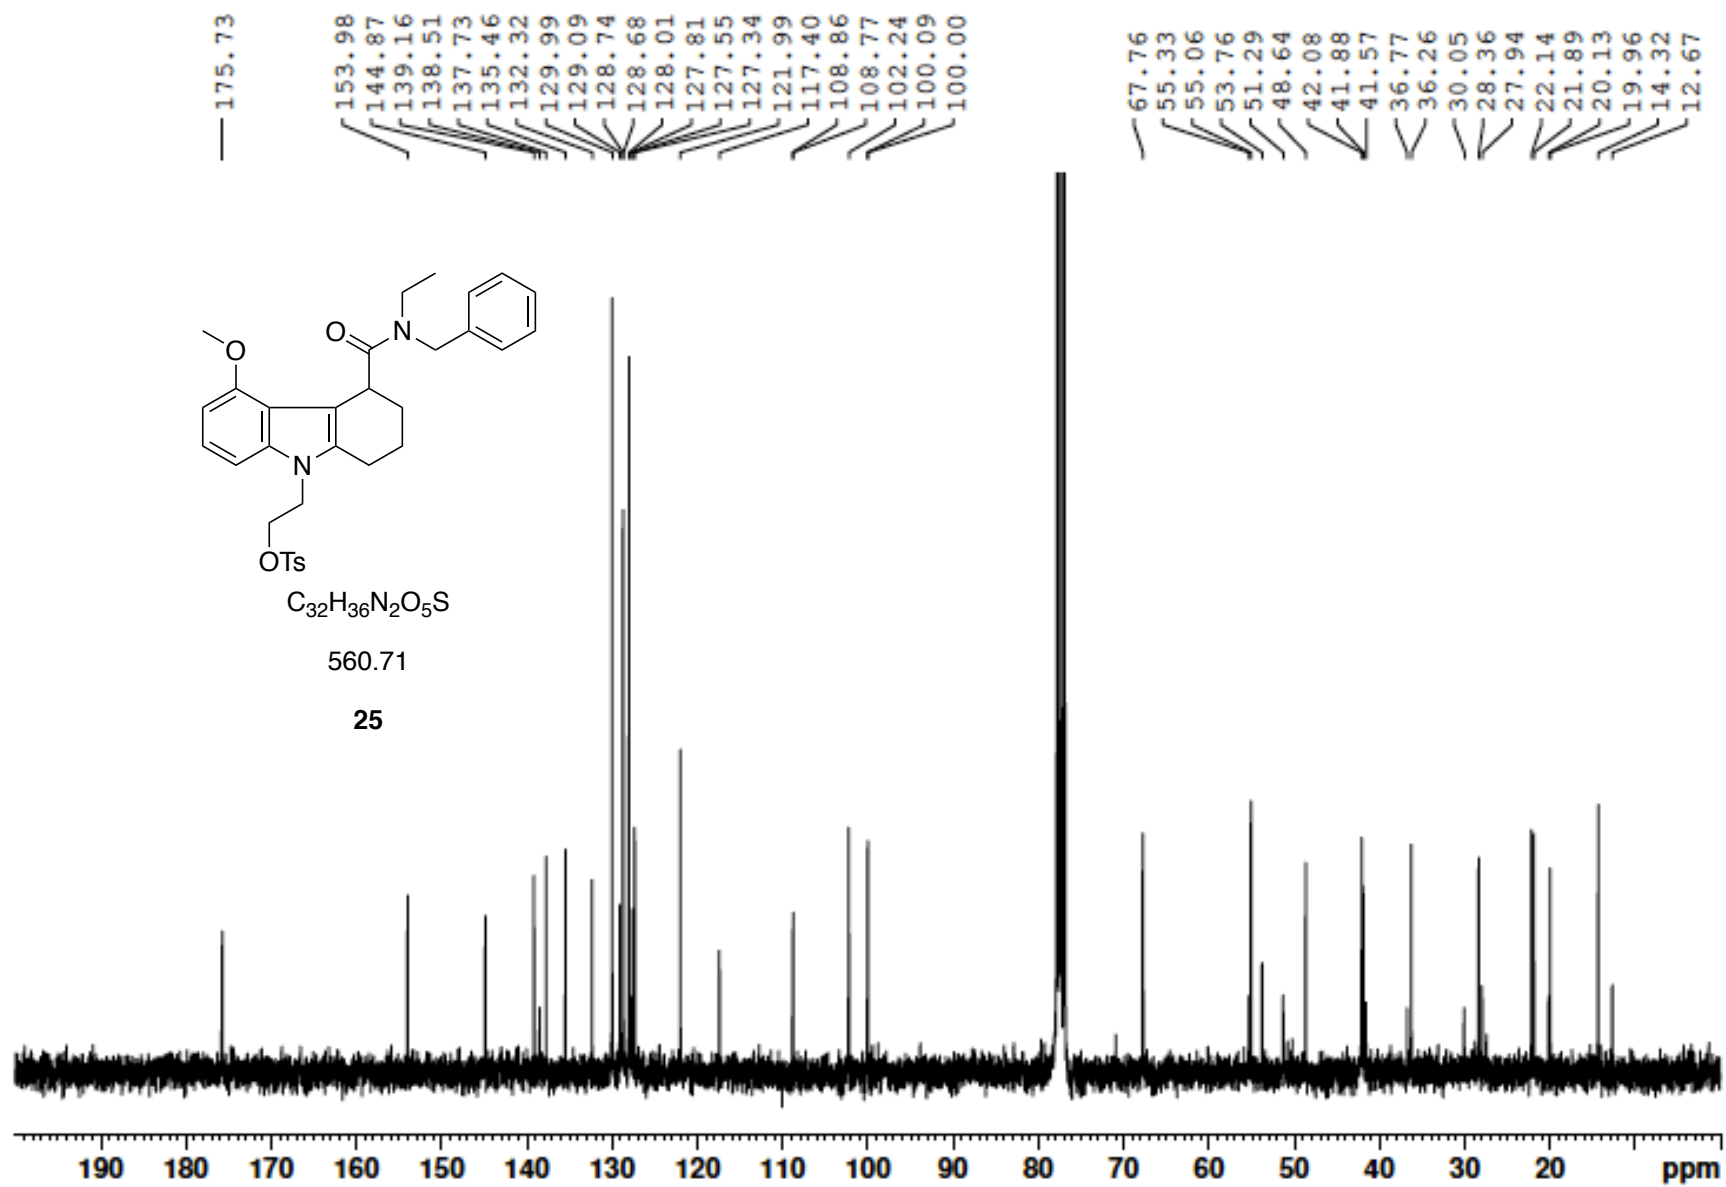

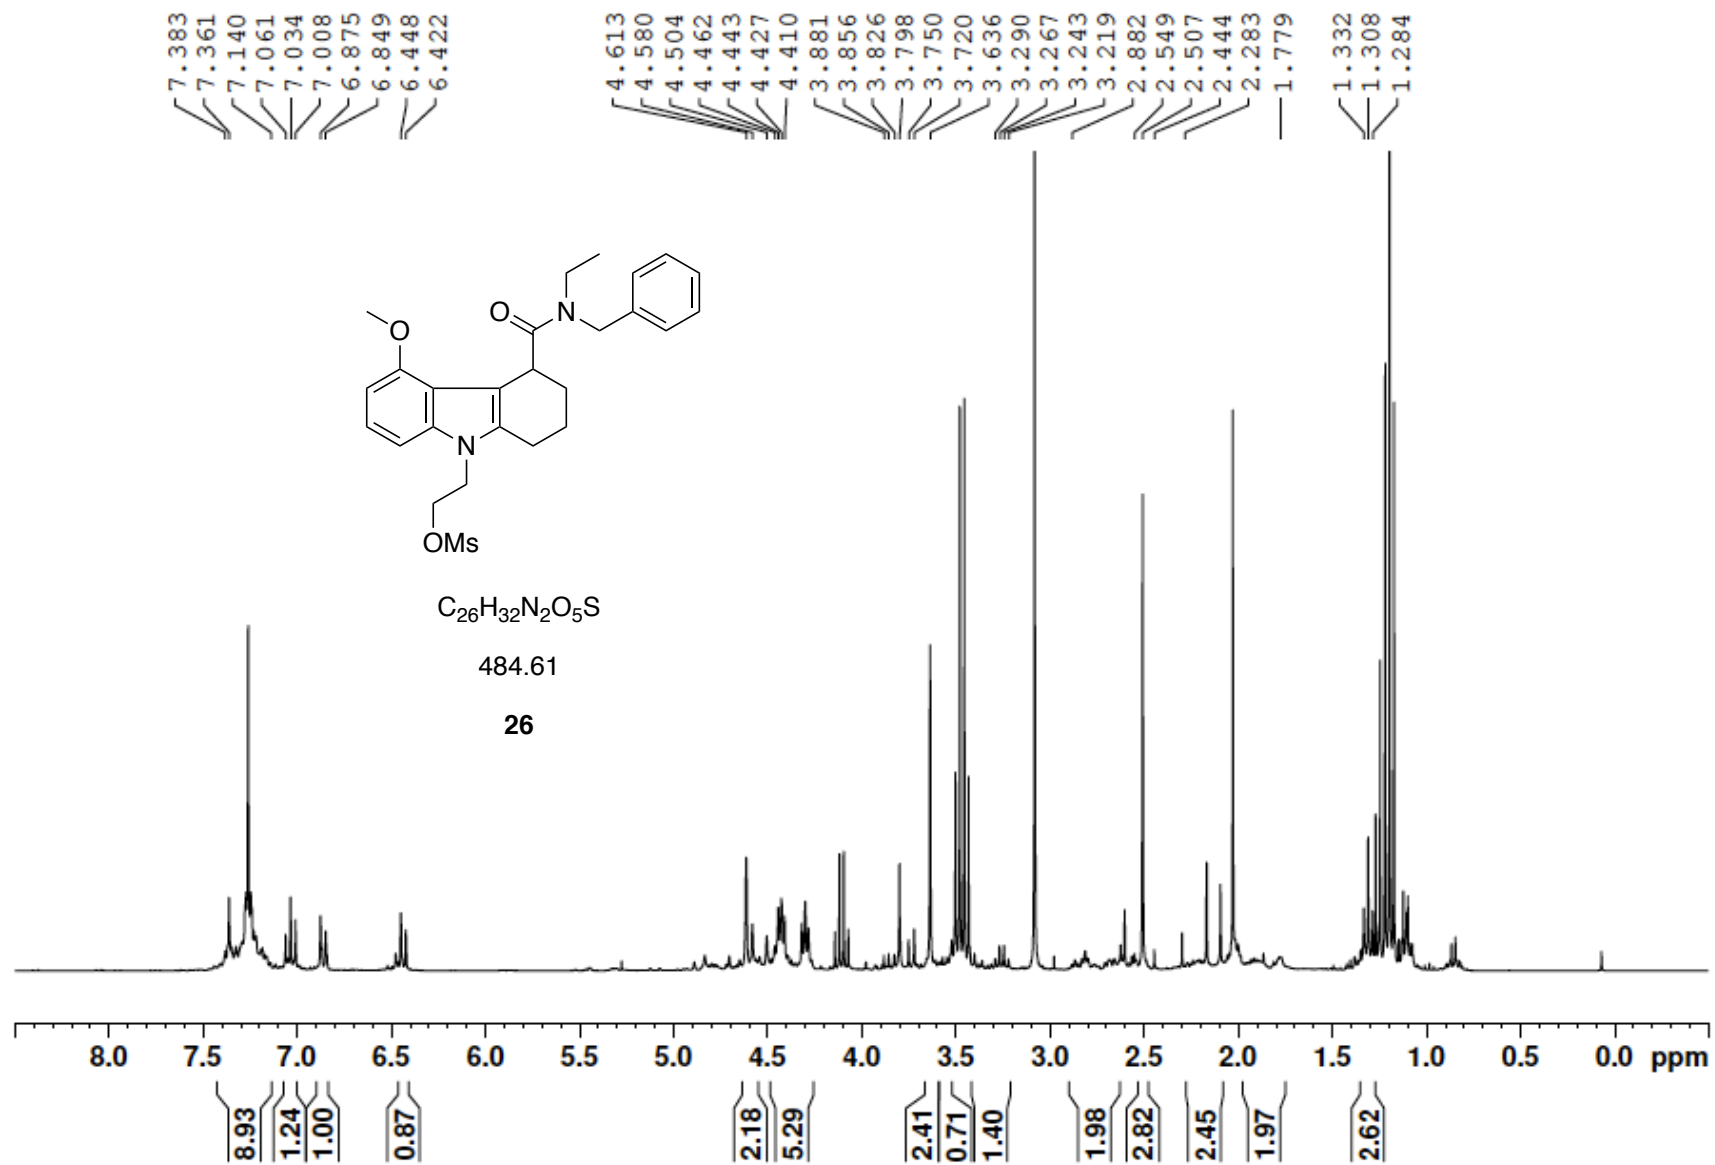

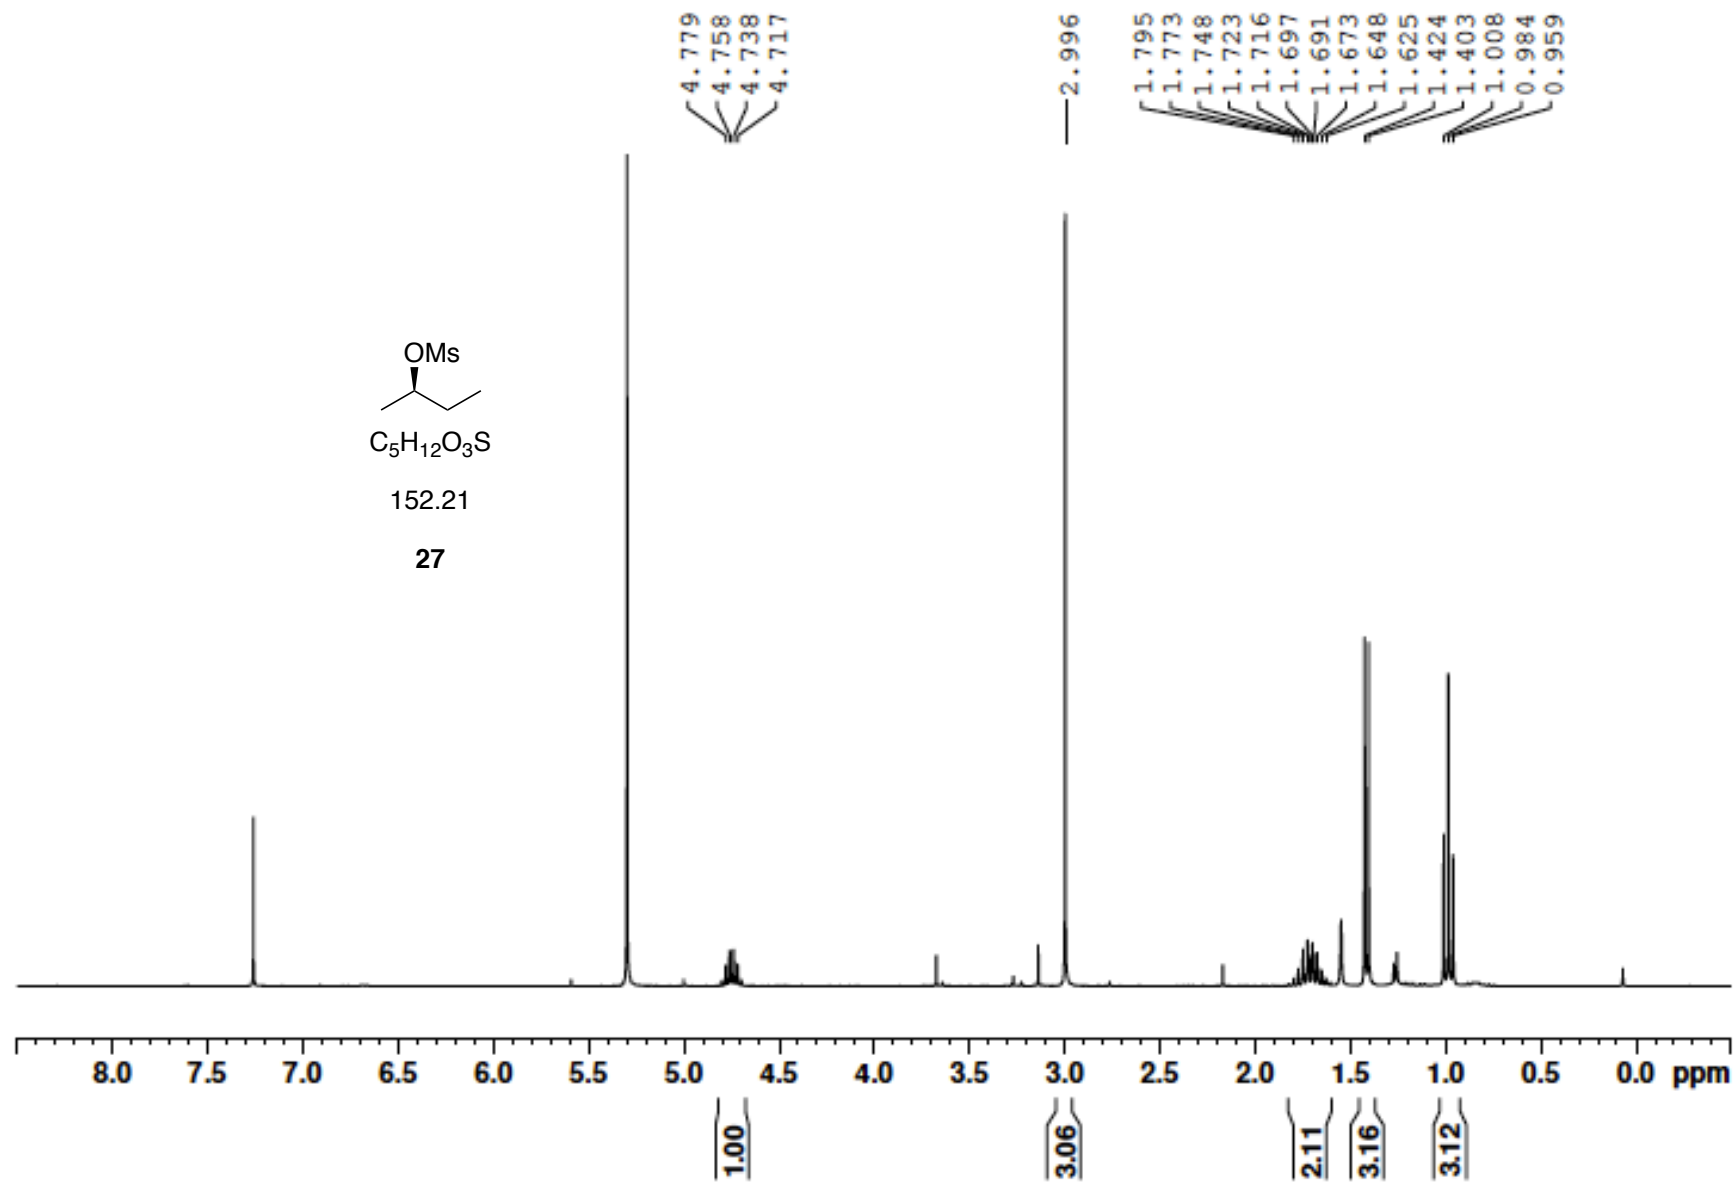

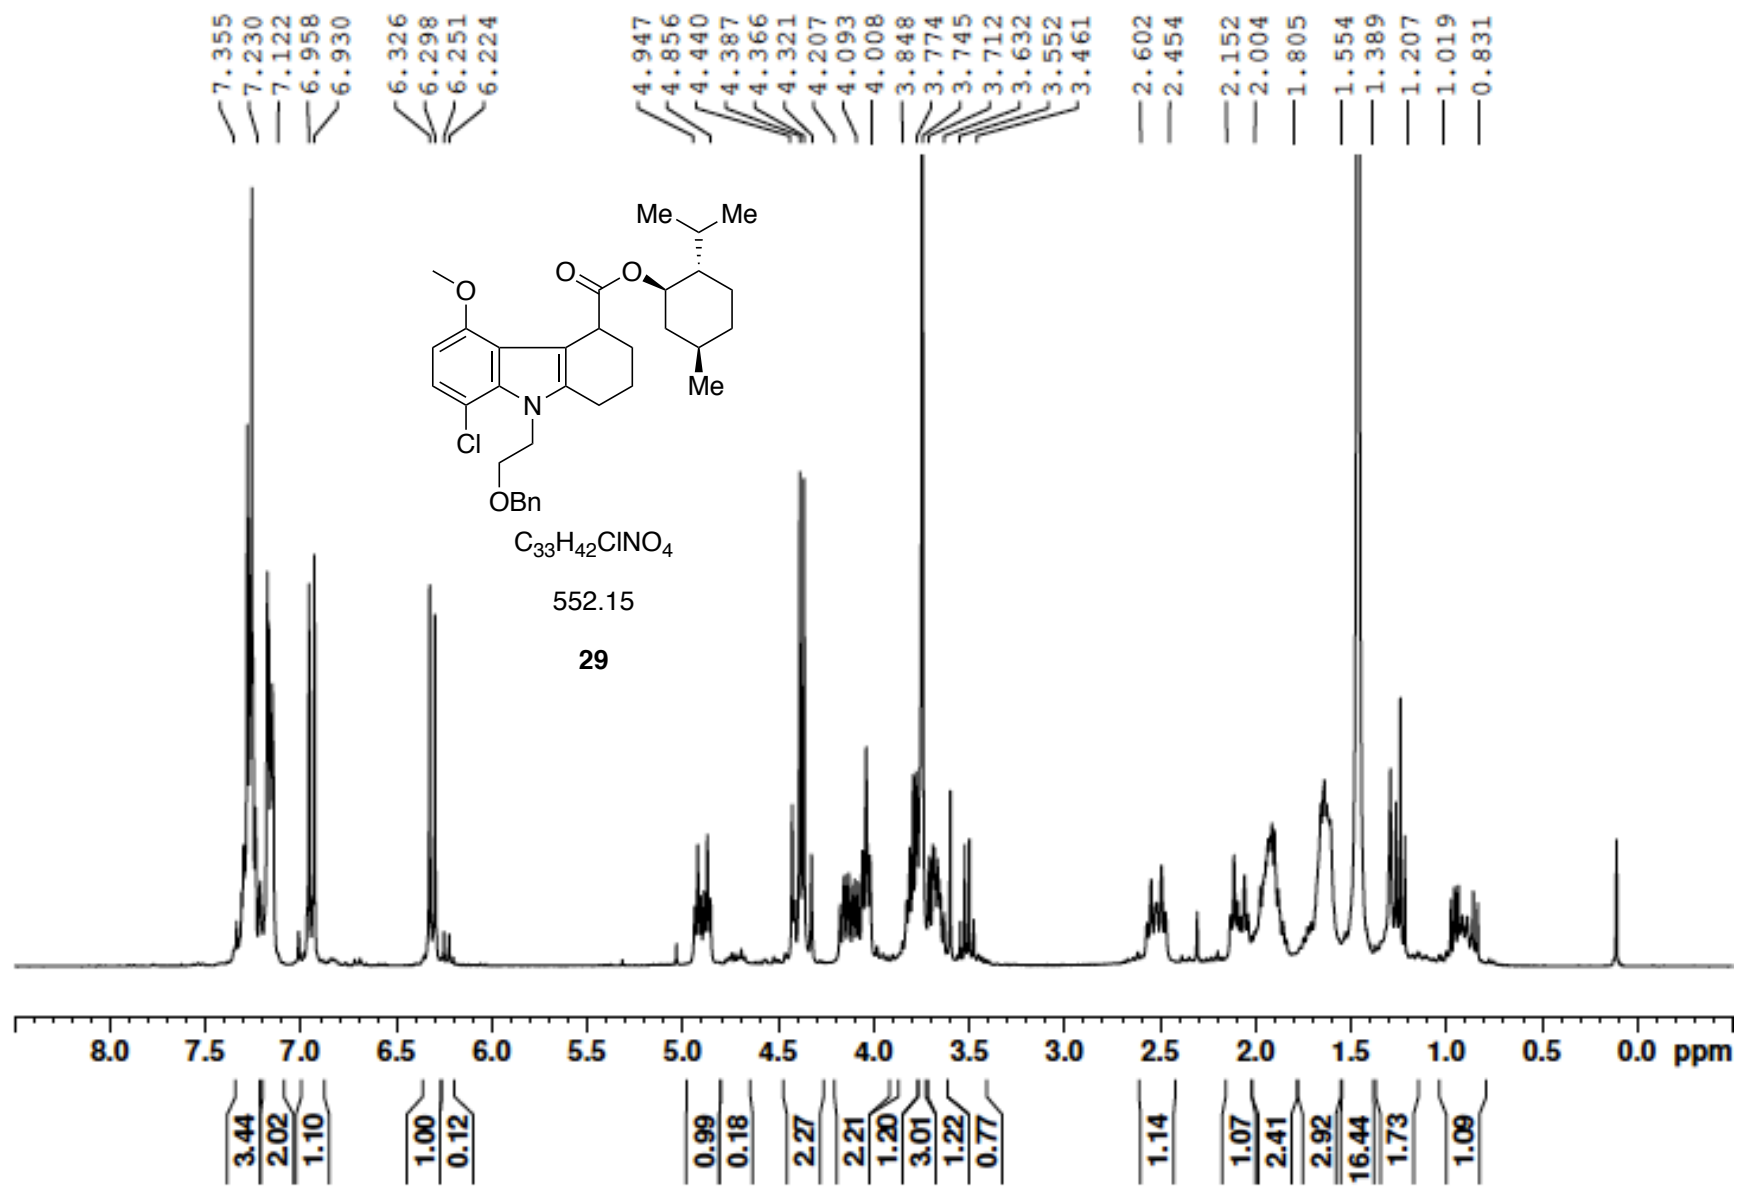



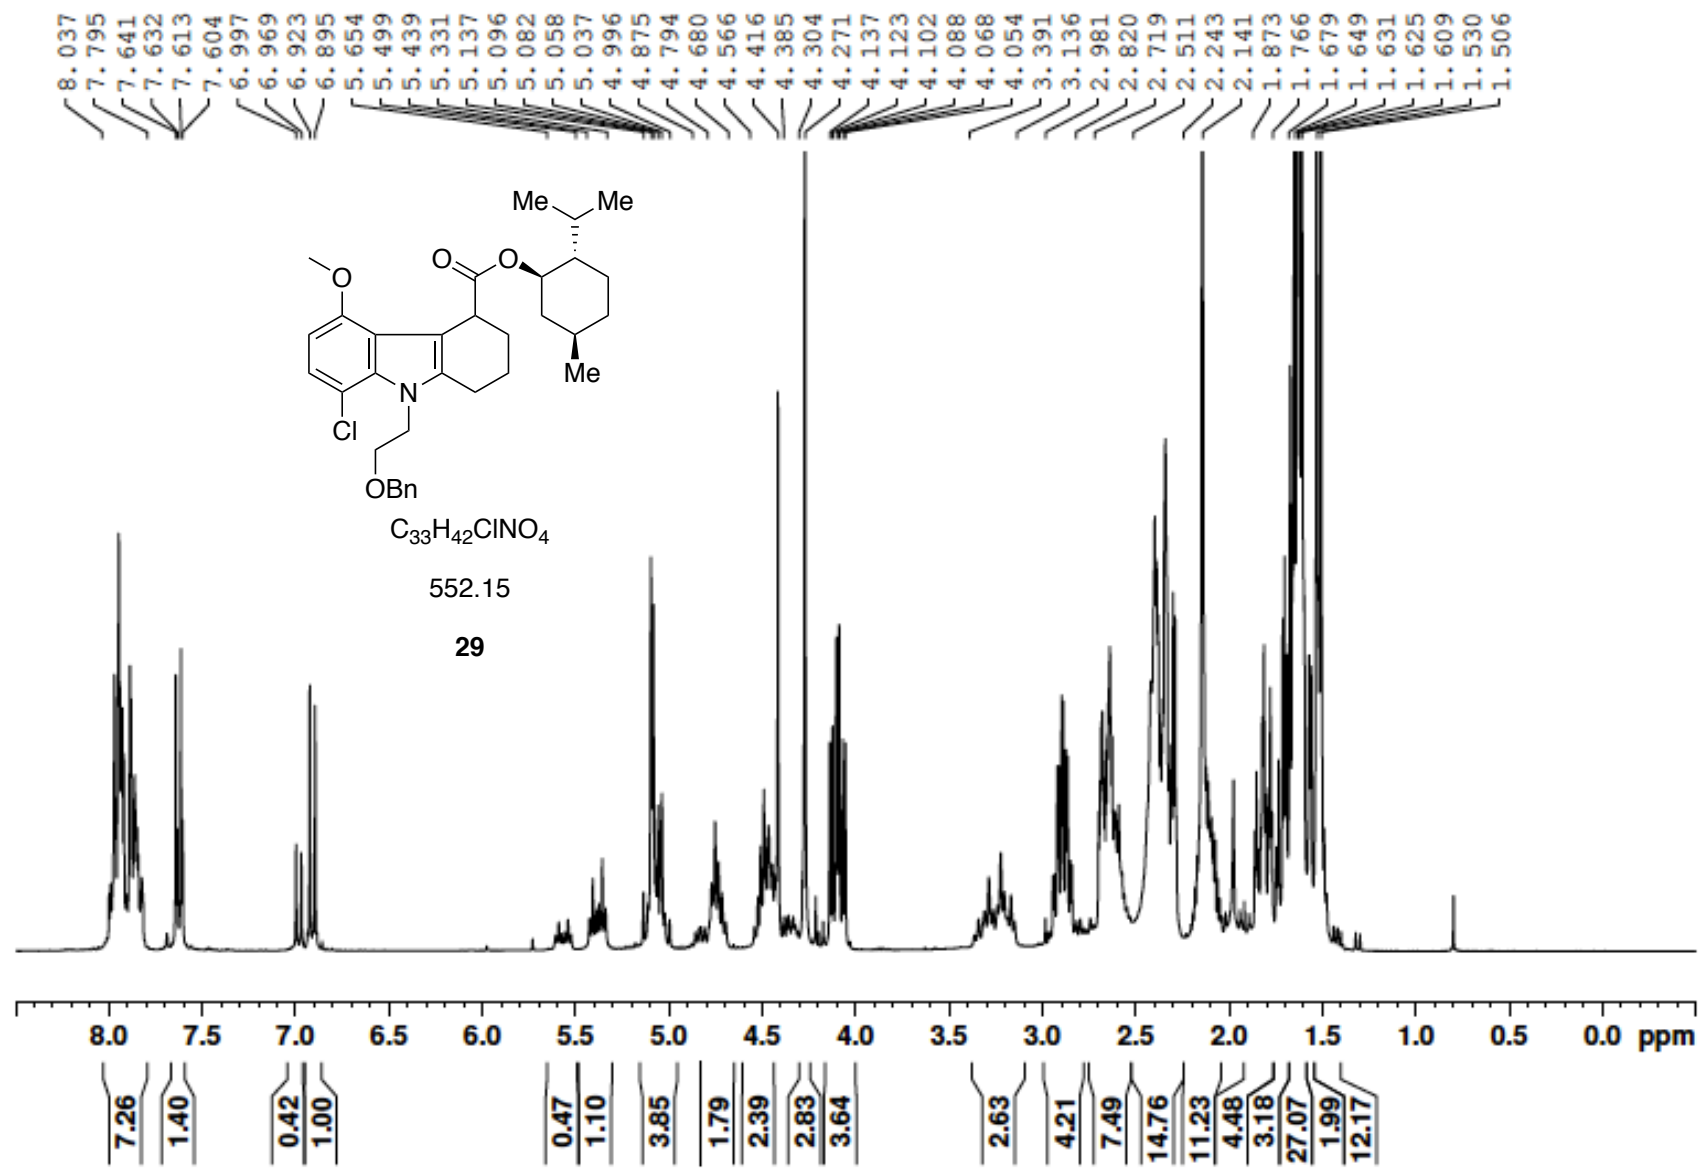

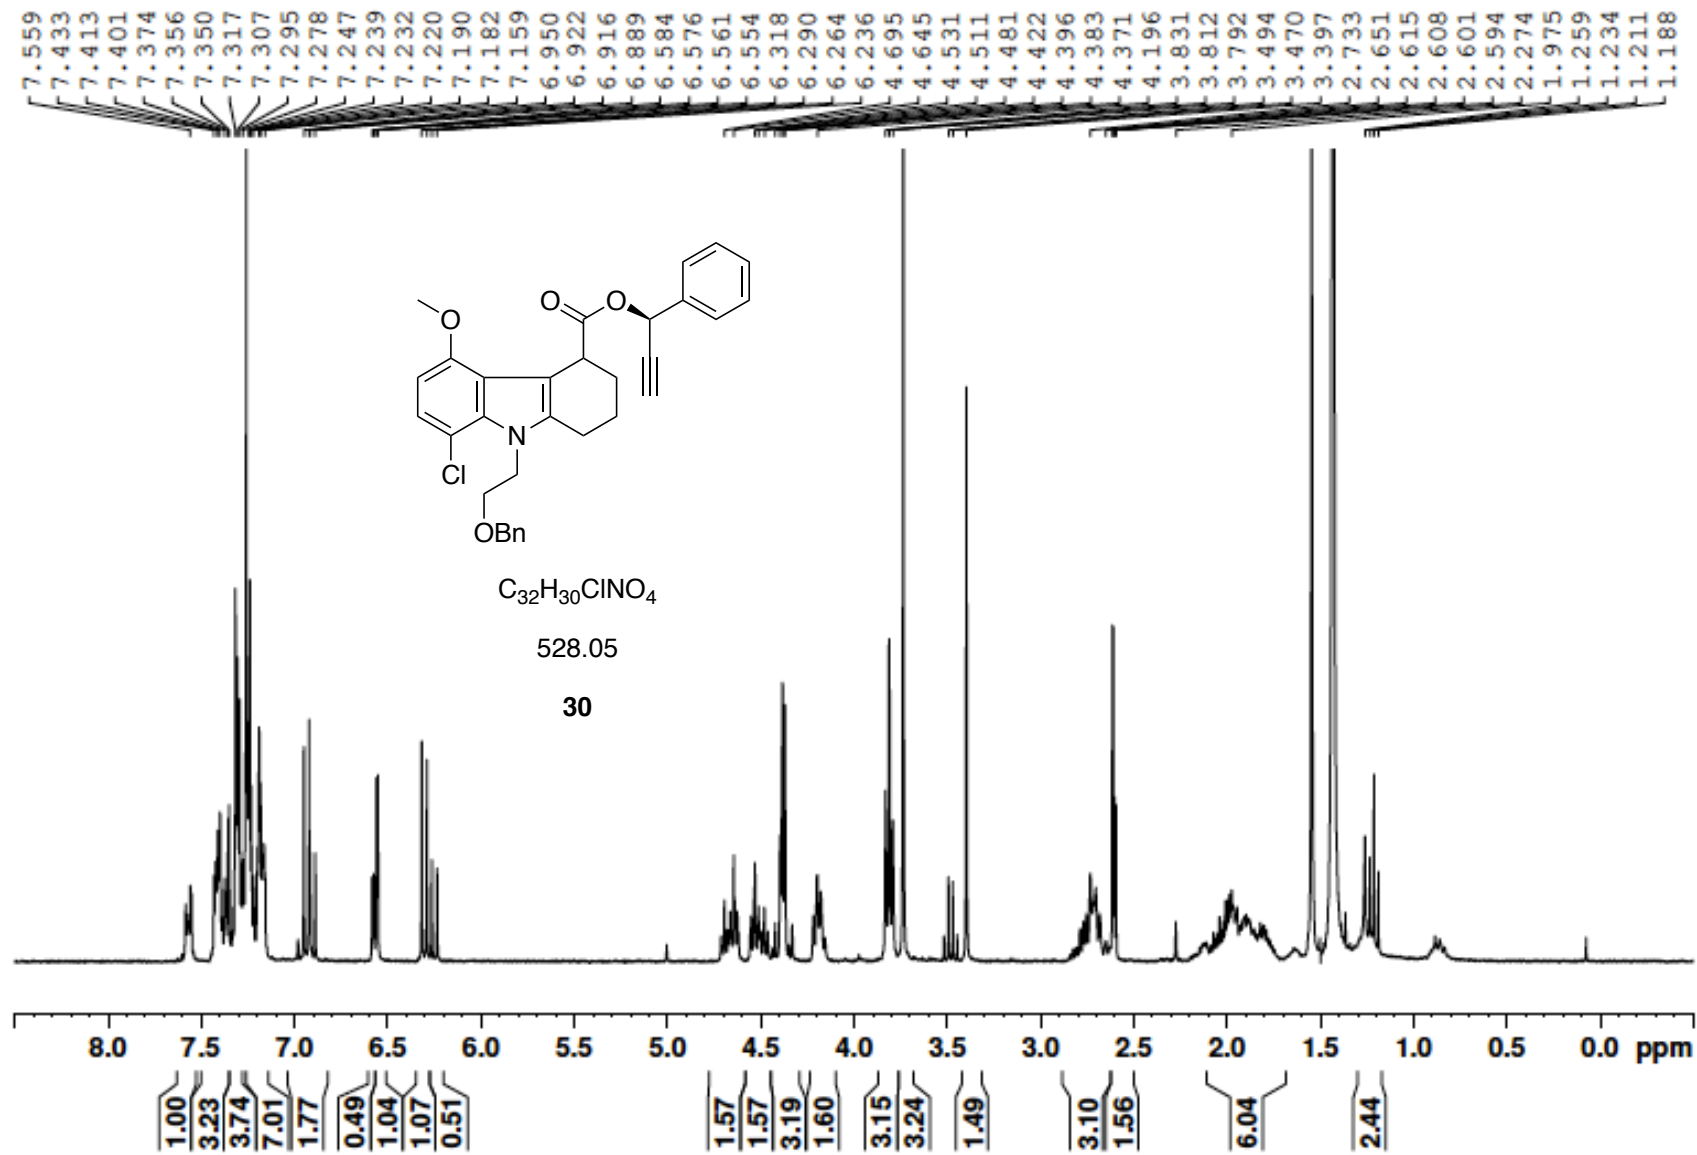

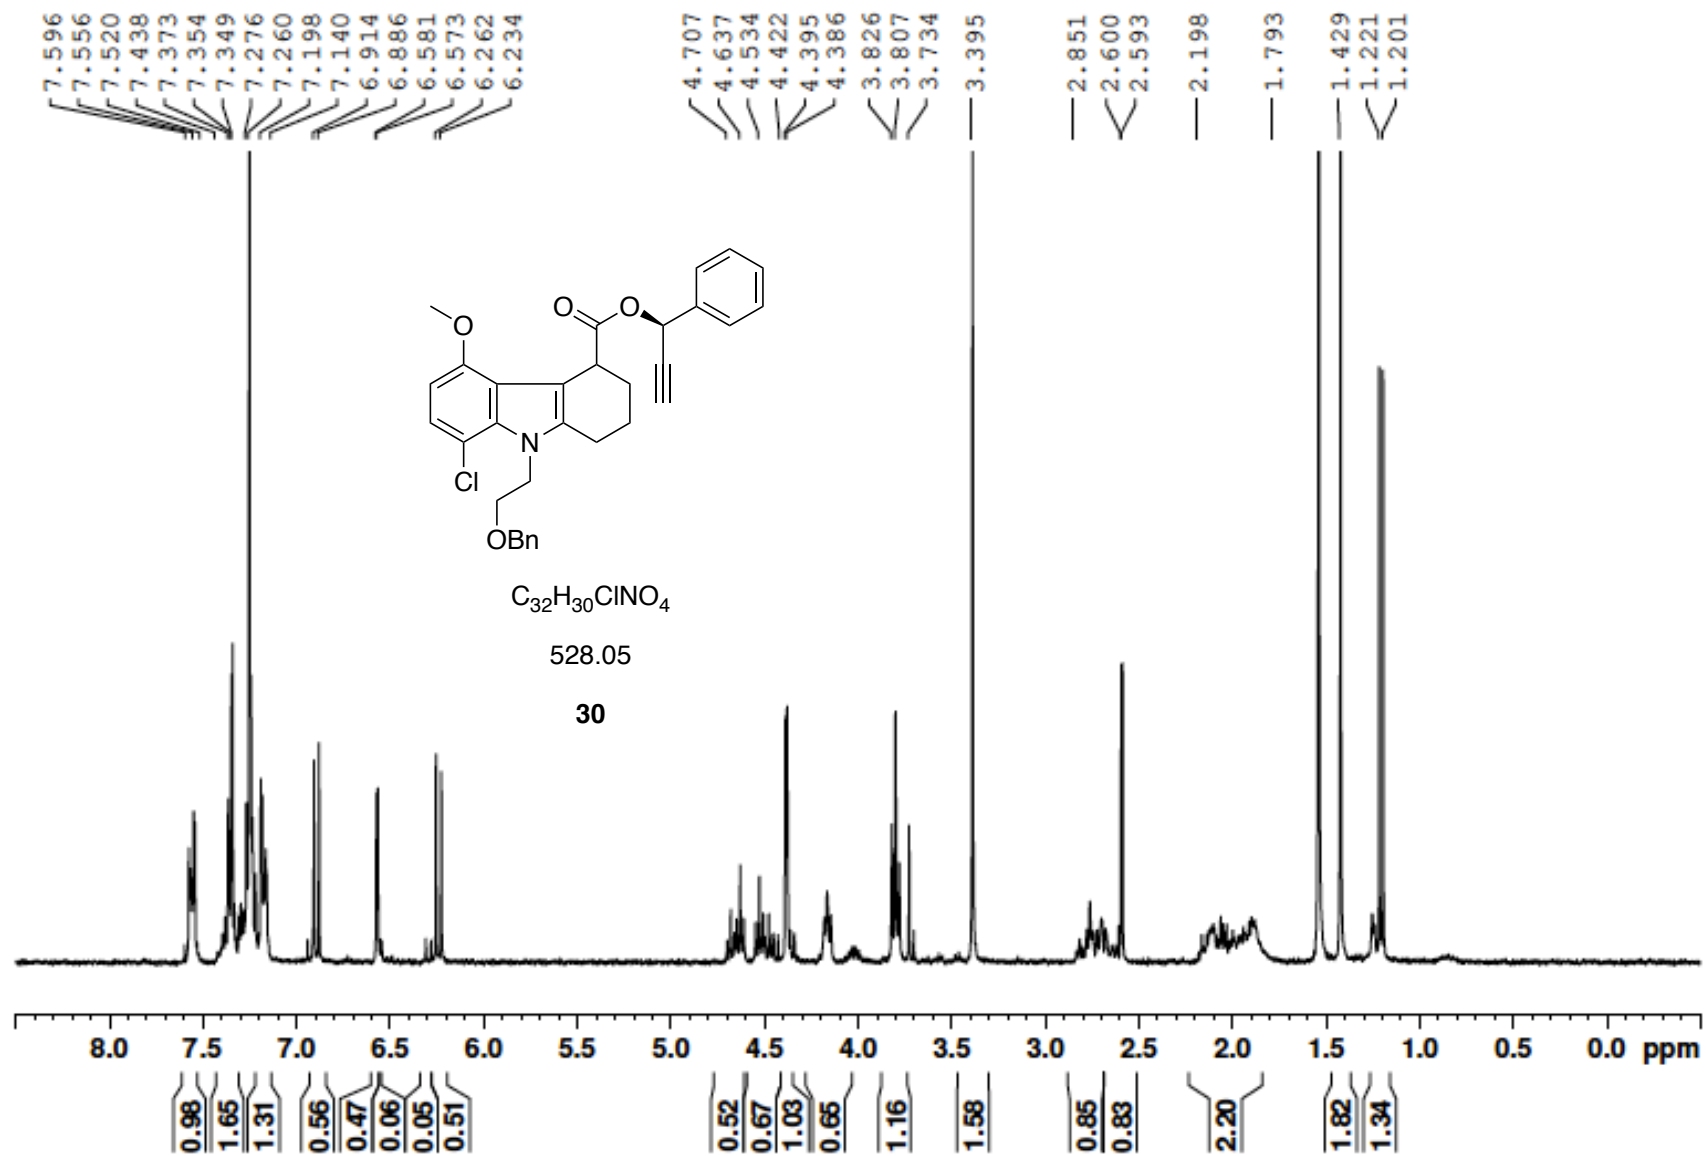

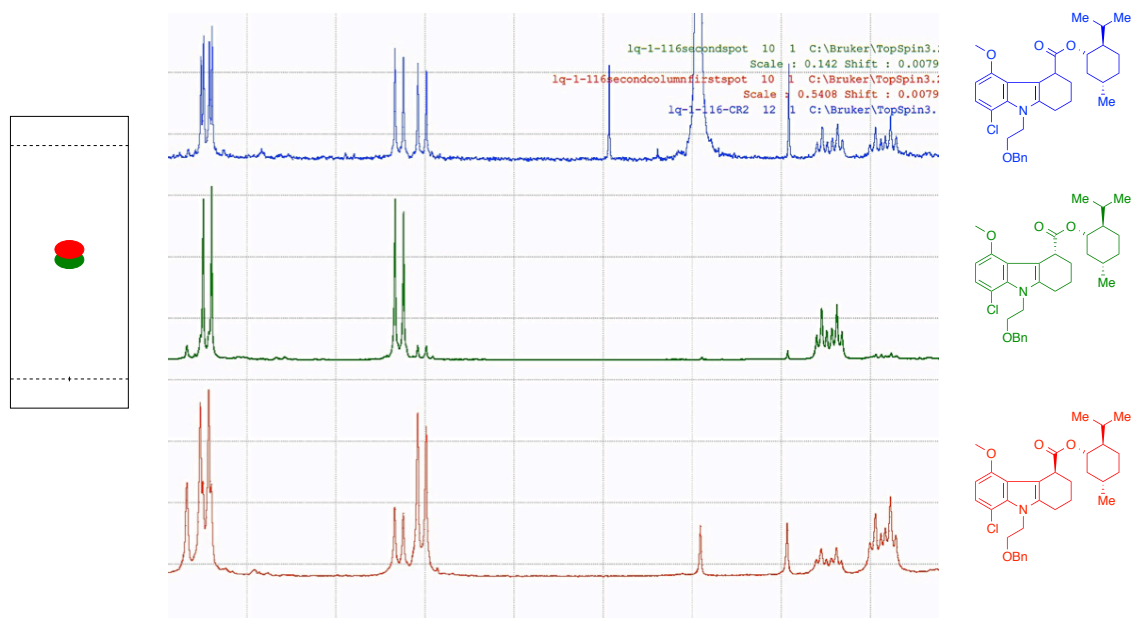

**Figure S2:** TLC and <sup>1</sup>H NMR evidence of the diastereomeric mixture of ester **29** (absolute stereochemistry of the diastereomers was not determined).

### Chiral separation by SFC – Chromatogram of **6** (GE387)

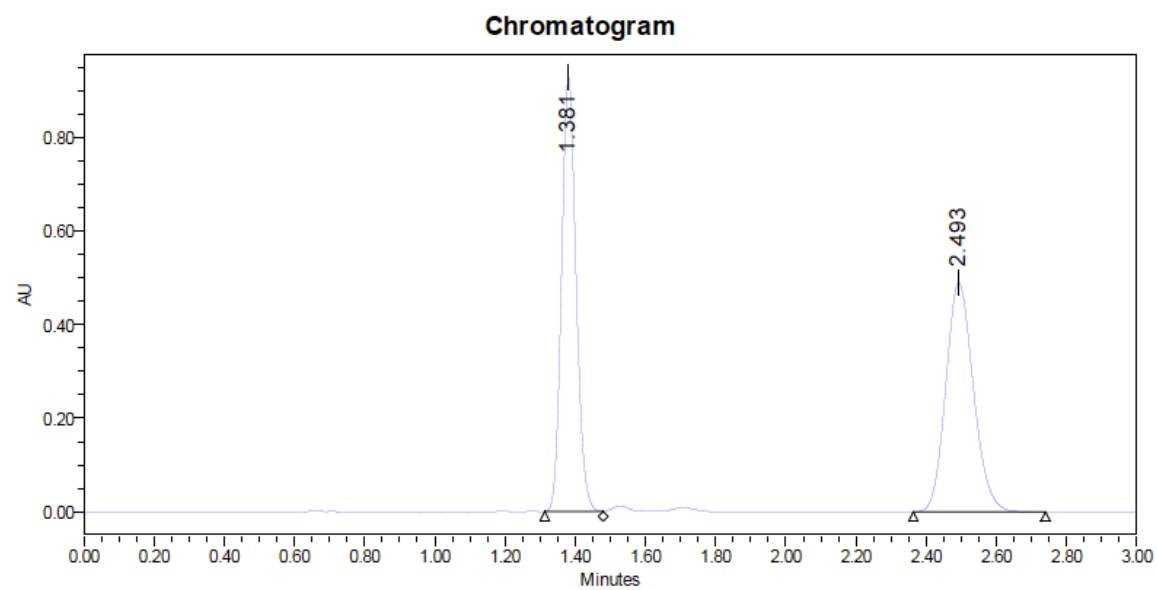

#### Peak Results

|   | Retention Time (min) | Area ( $\mu\text{V}\cdot\text{sec}$ ) | % Area |
|---|----------------------|---------------------------------------|--------|
| 1 | 1.38                 | 2668428                               | 49.9   |
| 2 | 2.49                 | 2682310                               | 50.1   |

Chiral separation by SFC – Chromatogram of **25** (GE387 radiolabelling precursor)

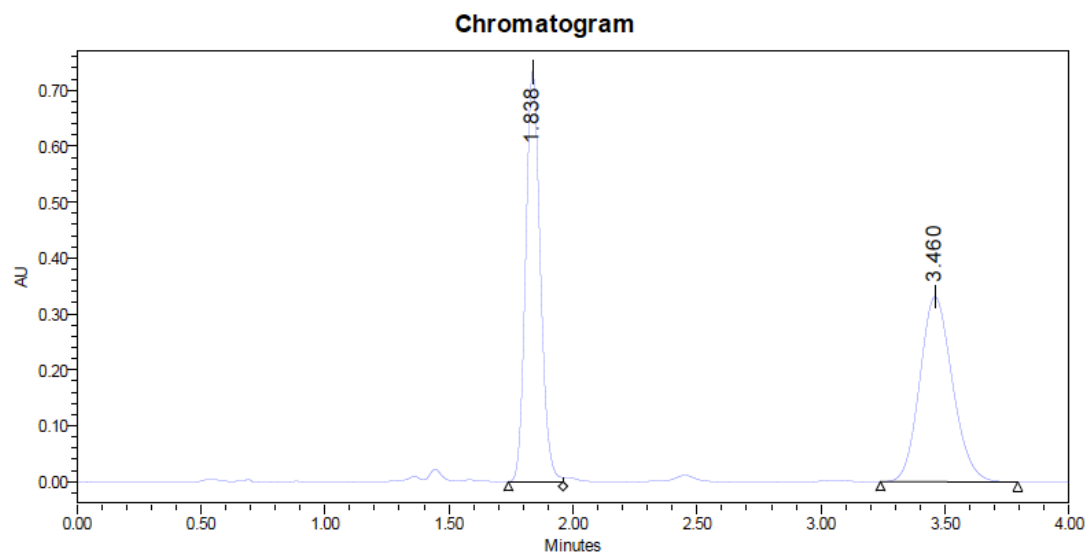

**Peak Results**

|   | Retention Time (min) | Area ( $\mu\text{V}\cdot\text{sec}$ ) | % Area |
|---|----------------------|---------------------------------------|--------|
| 1 | 1.84                 | 3009365                               | 49.8   |
| 2 | 3.46                 | 3030606                               | 50.2   |

Gamma and UV chromatograms respectively of semi-preparative purification of a) (S)-[<sup>18</sup>F]6 and b) (R)-[<sup>18</sup>F]6

a)

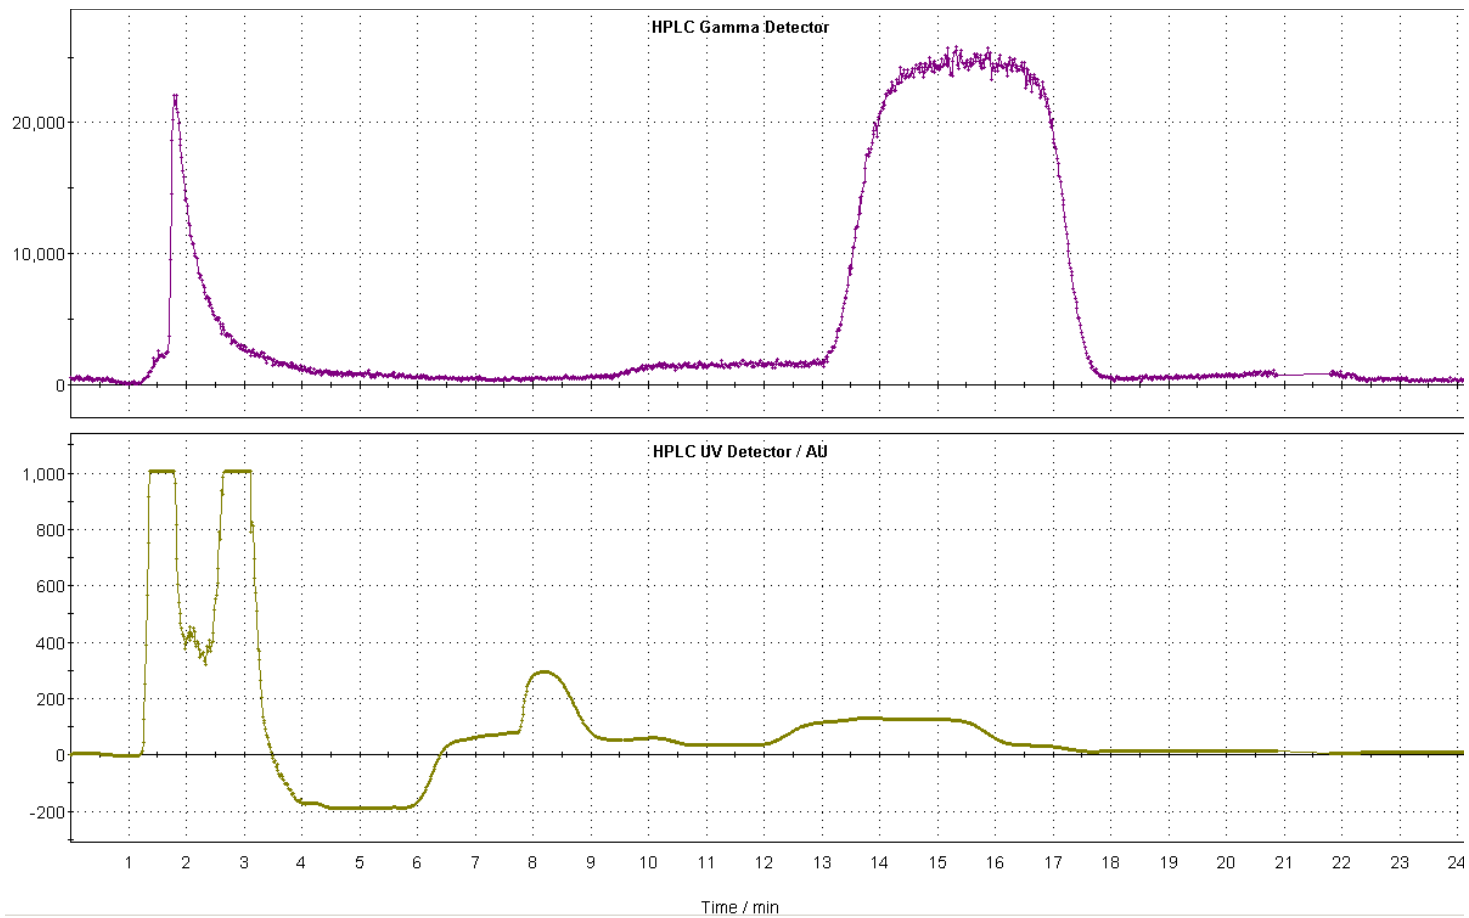

Gamma and UV chromatograms respectively of semi-preparative purification of a) (S)-[<sup>18</sup>F]6 and b) (R)-[<sup>18</sup>F]6

b)

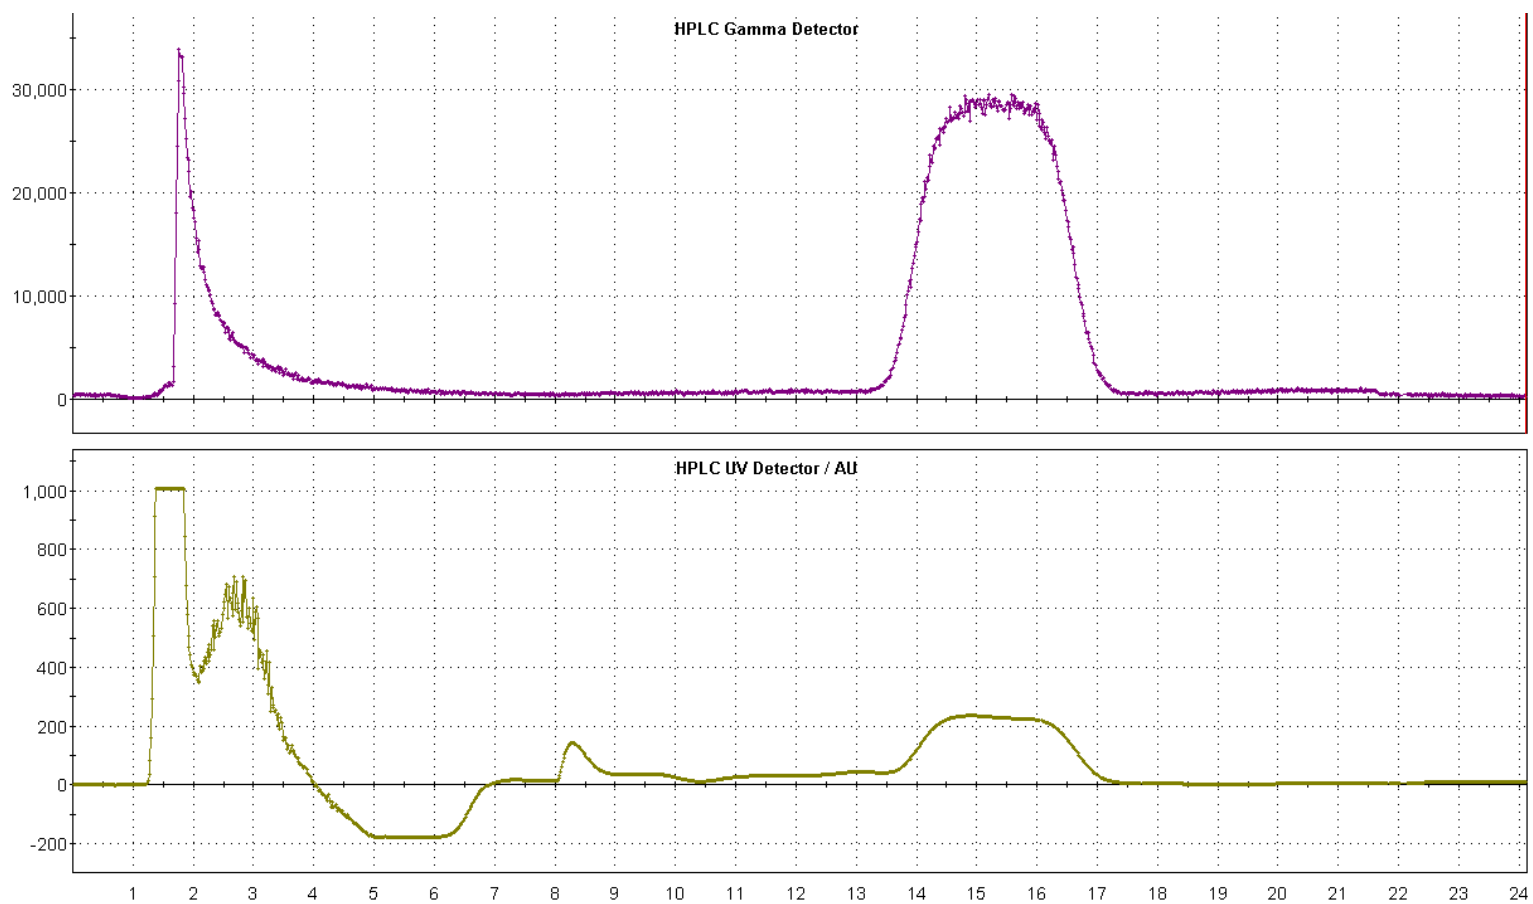



Chiral HPLC separation of a) (*S*, *R*)-**6**; b) (*S*)-**6** and c) (*R*)-**6** using Welk-O1 (*S*, *S*) Kromasil 5  $\mu\text{m}$ , 2.1x150 mm column, eluting with 40% MeOH in *i*PrOH at 0.3 mL/min.

a)

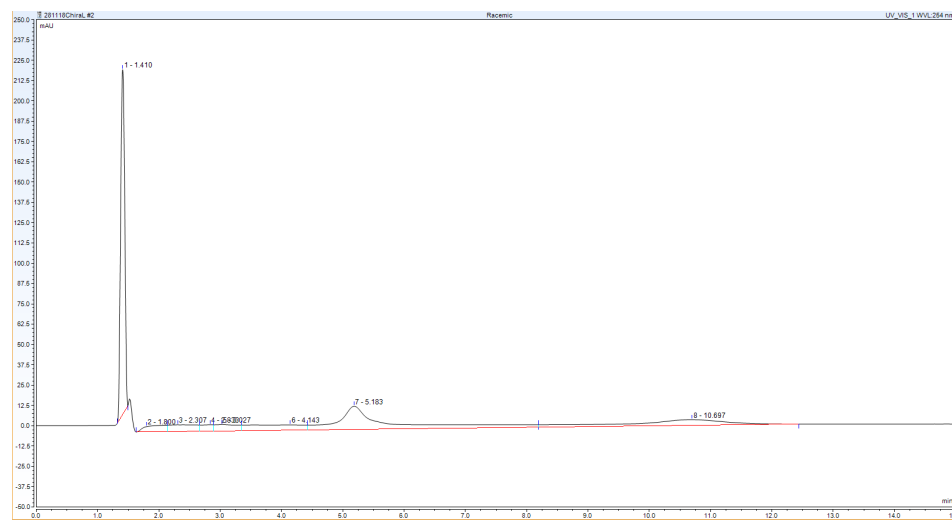

Chiral HPLC separation of a) (*S*, *R*)-**6**; b) (*S*)-**6** and c) (*R*)-**6** using Whelk-O1 (*S*, *S*) Kromasil 5  $\mu\text{m}$ , 2.1x150 mm column, eluting with 40% MeOH in *i*PrOH at 0.3 mL/min.

b)

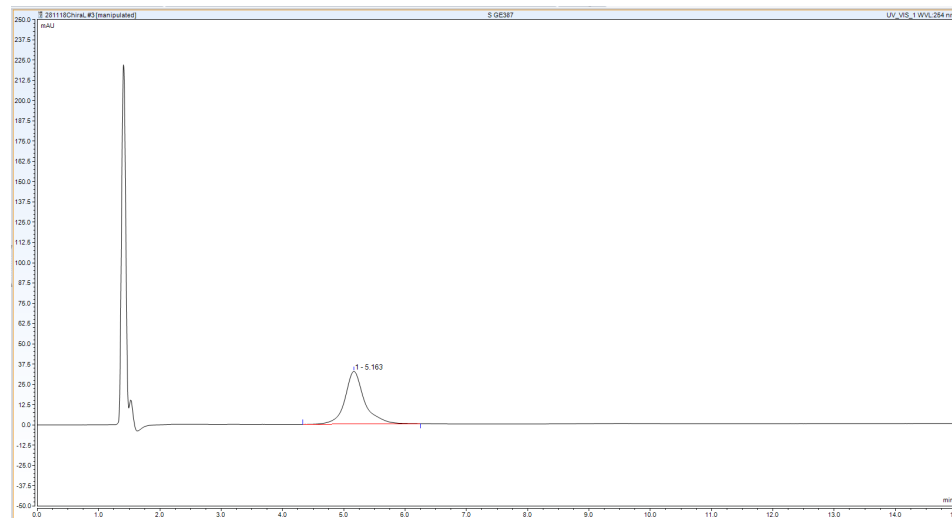

c)

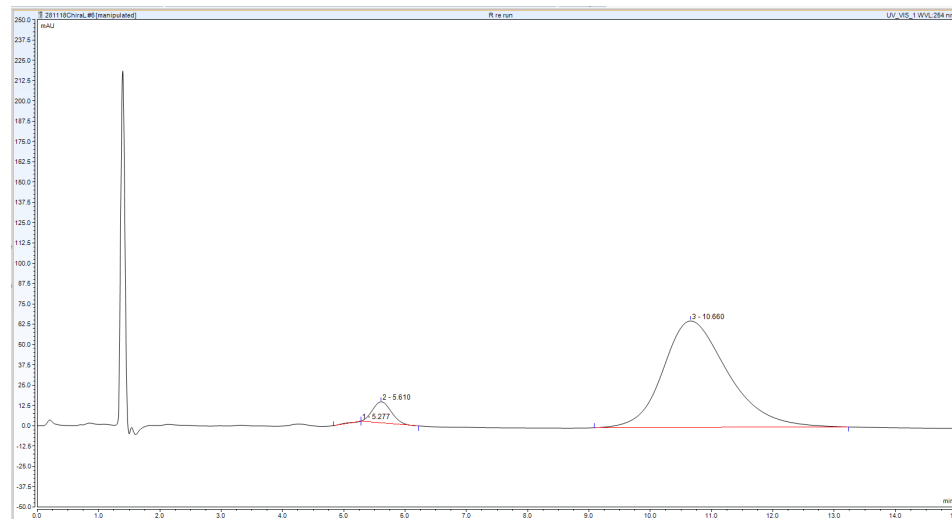

Supplement: CMDC-14-982-s001.pdf [file CMDC-14-982-s001.pdf]
